# Supplementary material
Source: PubMed Central journal article supplement (PMC5877401)
Supplement: NIHMS917866-supplement-Supplemental.pdf [file NIHMS917866-supplement-Supplemental.pdf]

## Supplementary Online Content

Mitchell JE, Christian NJ, Flum DR, et al. Postoperative behavioral variables and weight change 3 years after bariatric surgery. *JAMA Surg*. Published online April 20, 2016. doi:10.1001/jamasurg.2016.0395.

### **eAppendix.** Supplemental Text

#### **eFigure.** Participants and Weight Measurements

**eTable 1.** For RYGB (n=1513), relationship between the change in each modifiable behavior and year 3 percent weight change (controlling for age at time of surgery, sex, baseline BMI, and preoperative diabetes status).

**eTable 2.** For LAGB (n=509), relationship between the change in each modifiable behavior and year 3 percent weight change (controlling for age at time of surgery, sex, baseline BMI, and band size (large versus small)).

**eTable 3.** For RYGB (n=1514), unadjusted relationship between the change in each predictor and 3-year percent weight change.

**eTable 4.** For LAGB (n=509), unadjusted relationship between the change in each predictor and 3-year percent weight change.

**eTable 5.** The SRMR for each model for the RYGB analysis.

**eTable 6.** The SRMR for each model for the LAGB analysis.

**eTable 7.** Fit Summary Example: Self-weigh Week Model LAGB.

**eTable 8.** Fit Summary Example: Self-weigh Week Model RYGB.

**eTable 9.** Number of participants represented on each variable in eTables 1 and 2.

This supplementary material has been provided by the authors to give readers additional information about their work.

## **eAppendix. Supplemental Text**

### **Derivation of Behavioral Forms**

The behavioral forms utilized included sections drawn from other instruments, including the Questionnaire on Eating and Weight Patterns-Revised and a version of the night eating questionnaire. However, most of the items were chosen because they had been mentioned in prior literature and/or were considered as behaviors of interest by investigators on the project to address. The composite instrument was not validated. Data on alcohol usage was obtained using the AUDIT.

### **Dietary and Exercise Counseling Before and After Surgery**

The dietary and exercise counseling varied across sites and also varied across time, and therefore it cannot be meaningfully addressed. Some of the centers utilized well developed programs with preparatory work while others relied on one or two dietary counseling visits. No formal exercise counseling was routinely used. Also the involvement of patients in such programming was not systematically monitored.

### **Not Reporting Calorie Restriction Despite Weight Loss**

It is of note that 31.2% of respondents reported that they never reduced calorie intake after undergoing bariatric surgery. Given these participants' substantial weight losses, this most likely resulted from calorie restriction. It is certainly true that the subjects may not have understood the question. They may have assumed we were asking the question concerning their recent behavior rather than their behavior relative to their behavior prior to surgery, since the wording did not make this clear.

### **Multiple Behavior Change and LAGB**

The results of multiple behavior changes for LAGB are also seen in eTable 2. Participants who started to self-weigh, stopped eating when feeling full, and stopped eating continuously during the day after surgery lost on average about 26% of their baseline weight. This averages about 19% greater weight loss compared to participants who made no positive changes and 8% greater weight loss compared to participants who always reported these healthy behaviors.

### **Additional Discussion**

In the U.S., compliance with preparatory or after-care interventions following bariatric surgery is inconsistent<sup>1,2</sup> and these programs may lack structure. The results reported here suggest that structured programs to modify these behaviors could be of great importance in improving outcomes among bariatric surgery patients. That many participants were able to make these changes suggest that some of these behaviors are modifiable and that changes may result from the surgery or are secondary to the interventions by the bariatric team. Clearly this is information that should be given to patients before surgery relative to problematic eating behaviors, weight loss practices they may or may not be engaging in order to address their issues following the surgery to maximize weight loss. Further research needs to be done to identify the proper time frame and methods to implement such programs pre and post-surgical programs and to determine in other samples if these factors are truly predictive of weight loss.

1. Poole NA, Al Atar A, Lukanendran D, et al. Compliance with surgical after-care following bariatric surgery for morbid obesity: a retrospective study. *Obes Surg*, 2005; 15:261-265. PMID: 15802071.
2. El Chaar M, McDeavitt K, Richardson S, et al. Does patients compliance with pre-operative bariatric office visits affect post-operative excess weight loss? *Surg Obes Relat Dis*, 2011; 7:743-748.

## Relationship between 3-Year Weight Change and Behavioral Changes

eTables 3 and 4 present the unadjusted relationships between 3-year weight change and behavioral change. Behavioral change was defined as,

- Never, participant reported not doing the behavior at baseline or at any follow-up time point
- Always, participant reported doing the behavior at baseline and at every follow-up time point
- Stopped, participant reported doing the behavior at baseline and not doing the behavior at every follow-up time point
- Started, participant reported not doing the behavior at baseline and doing the behavior at every follow-up time point
- Sometimes, initially no, participant reported not doing the behavior at baseline and doing the behavior sometimes at follow-up
- Sometimes, initially yes, participant reported doing the behavior at baseline and doing the behavior sometimes at follow-up

Participants were included in the analysis if they had data at baseline and at every follow-up visit.

The statistically significant findings are a reflection of the sample size and the detailed behavioral change definition.

For RYGB, the behavioral changes that resulted in a significant difference in percent weight change are: eating or drinking meal replacements, keep eating when feeling full, eating continuously during the day, binge eating, binge eating disorder, loss of control eating, alcohol use disorder, and smoking.

For LAGB, the behavioral changes that resulted in a significant difference in percent weight change are: self-weighing, decreasing fat intake, and eating special low calorie diet foods.

## Statistical Power

To provide an idea of the effect size for behaviors that could be detected over and above that of the variables included in the models (i.e., age, baseline BMI, sex, and either pre-operative diabetes status [RYGB models] or band size [LAGB models]), we used linear regression to approximate the complex CALIS models. We used  $n=1513$  for the RYGB models and  $n=509$  for the LAGB models, corresponding to the sample sizes in etable 2.

If the 4 variables included in the models accounted for between 10 and 50% of the variance in 3 year weight, then adding up to 4 behavioral variables (i.e., the behavioral variable at up to 4 timepoints) would enable us, with 80% power, to detect an additional 1-2% variance explained. For example, if the 4 independent variables in the model explained 10% of the variance in 3 year weight, then four additional independent variable could explain an additional 1% of the variance for the RYGB models (using  $n=1513$  as the sample size) or 2% for the LAGB models ( $n=509$ ). If 30% of the variance was explained by the four baseline characteristics, then there would be 80% power to detect a 1%, or smaller, increase in variance explained by the behavioral variables for each surgery type.

**eFigure. Participants and Weight Measurements**

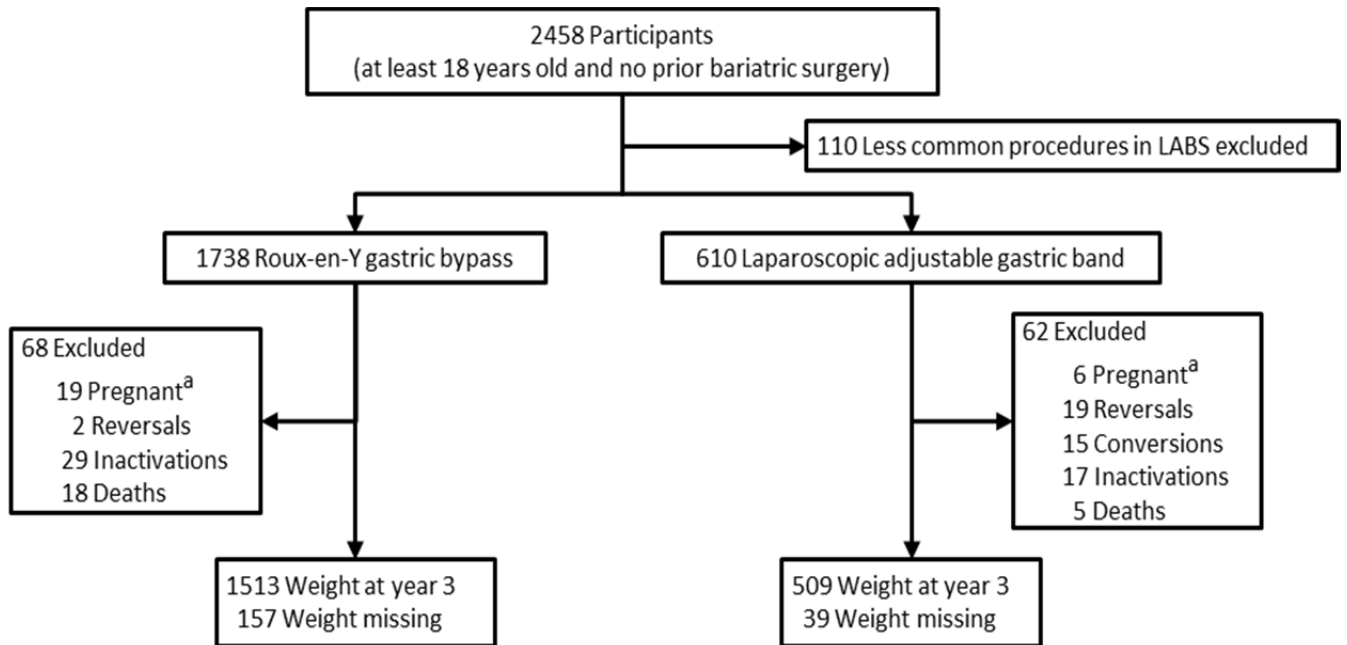

<sup>a</sup>Weights of women in their 2nd or 3rd trimester and those up to 6-months postpartum were excluded.

**eTable 1. For RYGB (n=1513), relationship between the change in each modifiable behavior and year 3 percent weight change (controlling for age at time of surgery, sex, baseline BMI, and preoperative diabetes status).**

| Modifiable Positive Behavior <sup>a</sup> | Model-Based Year 3 Percent Weight Change |                     |                    | Model-Based Mean Difference (95% CI) of |                   |                   | P-value         |                |                 |
|-------------------------------------------|------------------------------------------|---------------------|--------------------|-----------------------------------------|-------------------|-------------------|-----------------|----------------|-----------------|
|                                           | Mean (SE)                                |                     |                    | Year 3 Percent Weight Change            |                   |                   | Always v. Never | Start v. Never | Start v. Always |
|                                           | Never <sup>b</sup>                       | Always <sup>c</sup> | Start <sup>d</sup> | Always – Never                          | Start – Never     | Start – Always    |                 |                |                 |
| <b>Self-weigh weekly</b>                  | -31.0 (0.6)                              | -31.7 (0.4)         | -33.9 (0.5)        | -0.7 (-2.5, 1.1)                        | -3.0 (-4.9, -1.1) | -2.3 (-3.6, -0.9) | >0.99           | <.001          | <.001           |
| <b>See nutritionist/dietitian</b>         | -31.5 (0.3)                              | –                   | –                  | –                                       | –                 | –                 | –               | –              | –               |
| <b>See trainer/exercise specialist</b>    | -31.4 (0.3)                              | –                   | –                  | –                                       | –                 | –                 | –               | –              | –               |
| <b>Keep a food diary</b>                  | -31.5 (0.3)                              | –                   | –                  | –                                       | –                 | –                 | –               | –              | –               |
| <b>Count fat grams</b>                    | -31.3 (0.3)                              | –                   | -35.8 (1.7)        | –                                       | -4.5 (-7.9, -1.1) | –                 | –               | 0.010          | –               |
| <b>Decrease fat intake</b>                | -31.2 (0.4)                              | -31.9 (1.0)         | -33.2 (0.9)        | -0.7 (-3.5, 2.0)                        | -2.0 (-4.5, 0.5)  | -1.3 (-3.2, 0.6)  | >0.99           | 0.16           | 0.32            |
| <b>Reduce number of calories eaten</b>    | -31.2 (0.4)                              | -32.4 (1.1)         | -33.7 (1.0)        | -1.2 (-4.2, 1.8)                        | -2.5 (-5.2, 0.2)  | -1.3 (-3.2, 0.5)  | >0.99           | 0.08           | 0.24            |
| <b>Use a very low calorie diet</b>        | -31.1 (0.3)                              | –                   | -35.6 (1.4)        | –                                       | -4.6 (-7.4, -1.7) | –                 | –               | 0.002          | –               |
| <b>Cut out between-meal-snacking</b>      | -31.1 (0.3)                              | –                   | -35.6 (1.4)        | –                                       | -4.5 (-7.5, -1.5) | –                 | –               | 0.003          | –               |
| <b>Eat fewer high carbohydrate foods</b>  | -31.3 (0.4)                              | -31.7 (1.0)         | -33.1 (0.8)        | -0.4 (-3.2, 2.4)                        | -1.8 (-4.2, 0.6)  | -1.4 (-3.3, 0.5)  | >0.99           | 0.20           | 0.21            |
| <b>Eat special low calorie diet</b>       | -31.7 (0.3)                              | –                   | -31.3 (1.1)        | –                                       | 0.5 (-2.0, 2.9)   | –                 | –               | 0.71           | –               |

| foods                                              |                                                       |                     |                   |                                                                         |                   |                    |                       |                     |                      |
|----------------------------------------------------|-------------------------------------------------------|---------------------|-------------------|-------------------------------------------------------------------------|-------------------|--------------------|-----------------------|---------------------|----------------------|
|                                                    | -31.7 (0.3)                                           | –                   | -31.0 (1.5)       | –                                                                       | 0.7 (-2.3, 3.7)   | –                  | –                     | 0.66                | –                    |
| Eat or drink meal replacements                     |                                                       |                     |                   |                                                                         |                   |                    |                       |                     |                      |
| Increase fruits and vegetables                     | -31.4 (0.4)                                           | -31.7 (0.9)         | -33.1 (0.9)       | -0.3 (-2.9, 2.4)                                                        | -1.7 (-4.2, 0.8)  | -1.4 (-3.1, 0.3)   | >0.99                 | 0.32                | 0.16                 |
| Cut out sugar-sweetened beverages                  | -31.8 (0.4)                                           | -31.2 (0.6)         | -32.0 (0.7)       | 0.6 (-1.6, 2.8)                                                         | -0.2 (-2.3, 1.9)  | -0.8 (-2.3, 0.7)   | >0.99                 | >0.99               | 0.58                 |
| Eat breakfast regularly (6-7/week)                 | -31.6 (0.5)                                           | -31.2 (0.4)         | -32.8 (0.6)       | 0.4 (-1.3, 2.1)                                                         | -1.2 (-3.1, 0.8)  | -1.6 (-3.1, -0.1)  | >0.99                 | 0.44                | 0.03                 |
| Eat breakfast, lunch, dinner regularly (6-7/week)  | -31.3 (0.5)                                           | -31.3 (0.4)         | -32.9 (0.6)       | 0.0 (-1.7, 1.7)                                                         | -1.6 (-3.5, 0.3)  | -1.6 (-3.1, -0.2)  | >0.99                 | 0.12                | 0.02                 |
|                                                    | Model-Based Year 3 Percent Weight Change<br>Mean (SE) |                     |                   | Model-Based Mean Difference (95% CI) of<br>Year 3 Percent Weight Change |                   |                    | P-value               |                     |                      |
| Modifiable Negative Behavior                       | Never <sup>b</sup>                                    | Always <sup>c</sup> | Stop <sup>e</sup> | Always – Never                                                          | Stop – Never      | Stop – Always      | Always<br>v.<br>Never | Stop<br>v.<br>Never | Stop<br>v.<br>Always |
| Keep eating when feel full, more than once a week  | -31.3 (0.3)                                           | -24.7 (1.5)         | -33.9 (0.5)       | 6.6 (2.8, 10.5)                                                         | -2.6 (-4.0, -1.1) | -9.2 (-13.3, -5.1) | <.001                 | <.001               | <.001                |
| Keep eating when not hungry, more than once a week | -31.5 (0.3)                                           | -25.8 (1.1)         | -33.6 (0.5)       | 5.7 (2.8, 8.6)                                                          | -2.1 (-3.4, -0.7) | -7.8 (-10.8, -4.7) | <.001                 | <.001               | <.001                |
| Eat continuously during the day                    | -33.2 (0.4)                                           | -29.2 (0.4)         | -34.8 (0.6)       | 4.0 (2.2, 5.7)                                                          | -1.6 (-2.9, -0.2) | -5.6 (-7.3, -3.8)  | <.001                 | 0.01                | <.001                |
| Binge eating disorder                              | -31.6 (0.3)                                           | –                   | -33.2 (0.7)       | –                                                                       | -1.6 (-3.1, -0.1) | –                  | –                     | 0.04                | –                    |

|                               |             |             |             |                   |                   |                   |       |       |       |
|-------------------------------|-------------|-------------|-------------|-------------------|-------------------|-------------------|-------|-------|-------|
| <b>Loss of control eating</b> | -32.6 (0.3) | -28.1 (0.6) | -34.6 (0.6) | 4.5 (2.6, 6.4)    | -2.0 (-3.5, -0.6) | -6.5 (-8.5, -4.5) | <.001 | 0.003 | <.001 |
| <b>Night eating syndrome</b>  | -31.9 (0.3) | -27.3 (1.3) | -32.1 (0.8) | 4.6 (1.2, 8.0)    | -0.2 (-2.2, 1.9)  | -4.8 (-8.4, -1.2) | 0.003 | >0.99 | 0.005 |
| <b>Evening hyperphagia</b>    | -31.7 (0.3) | -28.3 (1.3) | -33.3 (1.0) | 3.4 (0.1, 6.7)    | -1.6 (-4.1, 0.9)  | -5.0 (-9.1, -0.9) | 0.04  | 0.37  | 0.01  |
| <b>Night eating</b>           | -31.6 (0.3) | -27.6 (1.6) | –           | 4.0 (0.7, 7.3)    | –                 | –                 | 0.02  | –     | –     |
| <b>Alcohol use disorder</b>   | -31.6 (0.3) | -31.2 (1.2) | -31.9 (1.3) | 0.4 (-2.7, 3.5)   | -0.4 (-3.3, 2.6)  | -0.8 (-3.9, 2.3)  | >0.99 | >0.99 | >0.99 |
| <b>Smoker</b>                 | -31.0 (0.3) | -34.8 (1.7) | –           | -3.9 (-7.2, -0.5) | –                 | –                 | 0.02  | –     | –     |
| <b>Illegal drug use</b>       | -31.4 (0.3) | -34.2 (1.6) | -29.6 (1.5) | -2.8 (-6.8, 1.1)  | 1.8 (-1.8, 5.4)   | 4.6 (0.1, 9.2)    | 0.26  | 0.69  | 0.04  |

<sup>a</sup> If a behavioral pattern was uncommon or (less than 5 participants with complete data reporting the pattern) then the mode-based estimates for that behavior were excluded from the results (shown by “–” in the table)

<sup>b</sup> *Never*, participant reported not doing the behavior at baseline or at any follow-up time point

<sup>c</sup> *Always*, participant reported doing the behavior at baseline and at every follow-up time point

<sup>d</sup> *Start*, participant reported not doing the behavior at baseline and doing the behavior at every follow-up time point

<sup>e</sup> *Stop*, participant reported doing the behavior at baseline and not doing the behavior at every follow-up time point

**eTable 2. For LAGB (n=509), relationship between the change in each modifiable behavior and year 3 percent weight change (controlling for age at time of surgery, sex, baseline BMI, and band size (large versus small)).**

| Modifiable Positive Behavior <sup>a</sup> | Model-Based Year 3 Percent Weight Change |                     |                    | Model-Based Mean Difference (95% CI) of |                    |                   | P-value     |             |              |
|-------------------------------------------|------------------------------------------|---------------------|--------------------|-----------------------------------------|--------------------|-------------------|-------------|-------------|--------------|
|                                           | Mean (SE)                                |                     |                    | Year 3 Percent Weight Change            |                    |                   | Always      | Start       | Start        |
|                                           | Never <sup>b</sup>                       | Always <sup>c</sup> | Start <sup>d</sup> | Always – Never                          | Start – Never      | Start – Always    | v.<br>Never | v.<br>Never | v.<br>Always |
| <b>Self-weigh weekly</b>                  | -14.5 (1.0)                              | -16.3 (0.8)         | -20.5 (1.1)        | -1.8 (-5.2, 1.6)                        | -6.0 (-9.6, -2.4)  | -4.2 (-6.9, -1.5) | 0.61        | <.001       | <.001        |
| <b>See nutritionist/dietitian</b>         | -15.9 (0.5)                              | –                   | –                  | –                                       | –                  | –                 | –           | –           | –            |
| <b>See trainer/exercise specialist</b>    | -16.1 (0.5)                              | –                   | –                  | –                                       | –                  | –                 | –           | –           | –            |
| <b>Keep a food diary</b>                  | -16.1 (0.5)                              | –                   | –                  | –                                       | –                  | –                 | –           | –           | –            |
| <b>Count fat grams</b>                    | -15.7 (0.5)                              | –                   | –                  | –                                       | –                  | –                 | –           | –           | –            |
| <b>Decrease fat intake</b>                | -14.9 (0.7)                              | –                   | -19.6 (1.7)        | –                                       | -4.7 (-8.6, -0.7)  | –                 | –           | 0.02        | –            |
| <b>Reduce number of calories eaten</b>    | -14.5 (0.7)                              | –                   | -21.3 (1.7)        | –                                       | -6.8 (-10.7, -2.8) | –                 | –           | <.001       | –            |
| <b>Use a very low calorie diet</b>        | -15.4 (0.6)                              | –                   | –                  | –                                       | –                  | –                 | –           | –           | –            |
| <b>Cut out between-meal-snacking</b>      | -15.4 (0.6)                              | –                   | -19.5 (2.2)        | –                                       | -4.1 (-8.9, 0.7)   | –                 | –           | 0.09        | –            |
| <b>Eat fewer high carbohydrate foods</b>  | -14.8 (0.7)                              | –                   | -18.9 (1.5)        | –                                       | -4.2 (-7.8, -0.5)  | –                 | –           | 0.03        | –            |
| <b>Eat special low calorie diet</b>       | -14.9 (0.6)                              | –                   | –                  | –                                       | –                  | –                 | –           | –           | –            |



| foods                                              |                                                       |                     |                   |                                                                         |                   |                                 |                       |                     |                      |
|----------------------------------------------------|-------------------------------------------------------|---------------------|-------------------|-------------------------------------------------------------------------|-------------------|---------------------------------|-----------------------|---------------------|----------------------|
|                                                    |                                                       |                     |                   |                                                                         |                   |                                 |                       |                     |                      |
|                                                    | Model-Based Year 3 Percent Weight Change<br>Mean (SE) |                     |                   | Model-Based Mean Difference (95% CI) of<br>Year 3 Percent Weight Change |                   |                                 | P-value               |                     |                      |
| Modifiable Negative Behavior                       | Never <sup>b</sup>                                    | Always <sup>c</sup> | Stop <sup>e</sup> | Always – Never                                                          | Stop – Never      | Stop – Always                   | Always<br>v.<br>Never | Stop<br>v.<br>Never | Stop<br>v.<br>Always |
| Eat or drink meal replacements                     | -15.6 (0.6)                                           | –                   | –                 | –                                                                       | –                 | –                               | –                     | –                   | –                    |
| Increase fruits and vegetables                     | -15.2 (0.6)                                           | –                   | -20.6 (1.9)       | –                                                                       | -5.5 (-9.7, -1.2) | –                               | –                     | 0.01                | –                    |
| Cut out sugar-sweetened beverages                  | -15.4 (0.8)                                           | -17.1 (1.4)         | -17.2 (1.3)       | -1.7 (-6.4, 2.9)                                                        | -1.9 (-6.1, 2.4)  | -0.1 (-3.0, 2.8)                | >0.99                 | 0.88                | >0.99                |
| Eat breakfast regularly (6-7/week)                 | -15.9 (1.0)                                           | -16.0 (0.8)         | -16.3 (1.3)       | -0.1 (-3.6, 3.4)                                                        | -0.4 (-4.2, 3.4)  | -0.3 (-3.3, 2.7)                | >0.99                 | >0.99               | >0.99                |
| Eat breakfast, lunch, dinner regularly (6-7/week)  | -15.5 (0.9)                                           | -16.7 (0.9)         | -16.9 (1.3)       | -1.1 (-4.5, 2.2)                                                        | -1.3 (-5.0, 2.3)  | -0.2 (-3.2, 2.7)                | >0.99                 | >0.99               | >0.99                |
| Keep eating when feel full, more than once a week  | -16.6 (0.6)                                           | -9.6 (1.8)          | -20.1 (1.1)       | 7.0 (2.0, 11.9)                                                         | -3.5 (-6.2, -0.7) | 10.5 <sup>-</sup> (-15.5, -5.5) | 0.002                 | 0.008               | <.001                |
| Keep eating when not hungry, more than once a week | -16.5 (0.7)                                           | -10.8 (1.4)         | -19.8 (1.0)       | 5.8 (1.7, 9.9)                                                          | -3.2 (-5.9, -0.6) | -9.0 (-13.4, -4.7)              | 0.002                 | 0.01                | <.001                |
| Eat continuously during the day                    | -18.5 (1.0)                                           | -13.8 (0.9)         | -19.8 (1.2)       | 4.7 (0.9, 8.5)                                                          | -1.4 (-4.0, 1.3)  | -6.1 (-9.8, -2.4)               | 0.009                 | 0.66                | <.001                |

|                               |             |             |             |                 |                   |                    |       |       |       |
|-------------------------------|-------------|-------------|-------------|-----------------|-------------------|--------------------|-------|-------|-------|
| <b>Binge eating disorder</b>  | -16.1 (0.5) | –           | -21.1 (1.3) | –               | -5.0 (-7.8, -2.2) | –                  | –     | <.001 | –     |
| <b>Loss of control eating</b> | -17.7 (0.7) | -12.7 (1.1) | -20.0 -1.2  | 5.1 (1.4, 8.8)  | -2.3 (-5.1, 0.5)  | -7.4 (-11.2, -3.6) | 0.003 | 0.14  | <.001 |
| <b>Night eating syndrome</b>  | -16.5 (0.6) | –           | -15.7 (1.6) | –               | 0.8 (-2.5, 4.2)   | –                  | –     | 0.63  | –     |
| <b>Alcohol use disorder</b>   | -15.5 (0.5) | –           | -19.0 (2.7) | –               | -3.4 (-8.7, 1.8)  | –                  | –     | 0.20  | –     |
| <b>Evening hyperphagia</b>    | -16.4 (0.6) | -13.7 (2.1) | -15.6 (2.3) | 2.7 (-2.8, 8.1) | 0.8 (-4.7, 6.3)   | -1.9 (-8.9, 5.1)   | 0.72  | >0.99 | >0.99 |
| <b>Night eating</b>           | -16.3 (0.5) | –           | -15.8 (3.1) | –               | 0.5 (-5.7, 6.7)   | –                  | –     | 0.88  | –     |
| <b>Smoker</b>                 | -15.9 (0.5) | –           | –           | –               | –                 | –                  | –     | –     | –     |
| <b>Illegal drug use</b>       | -15.9 (0.5) | –           | –           | –               | –                 | –                  | –     | –     | –     |

<sup>a</sup> If a behavioral pattern was uncommon or (less than 5 participants with complete data reporting the pattern) then the mode-based estimates for that behavior were excluded from the results (shown by “–” in the table)

<sup>b</sup> *Never*, participant reported not doing the behavior at baseline or at any follow-up time point

<sup>c</sup> *Always*, participant reported doing the behavior at baseline and at every follow-up time point

<sup>d</sup> *Start*, participant reported not doing the behavior at baseline and doing the behavior at every follow-up time point

<sup>e</sup> *Stop*, participant reported doing the behavior at baseline and not doing the behavior at every follow-up time point

**eTable 3. For RYGB (n=1514), unadjusted relationship between the change in each predictor and 3-year percent weight change.**

| Factor                                                     | n   | (%)    | Median (IQR) [range]              | Mean (SD)    | Mean Difference | Simultaneous 95% CI |
|------------------------------------------------------------|-----|--------|-----------------------------------|--------------|-----------------|---------------------|
| <b>Self-weigh at least weekly</b><br>(n=779, R2=2.6%)      |     |        |                                   |              |                 |                     |
| Never                                                      | 112 | (14.4) | -33.4 (-39.4,-25.2) [-54.8,0.6]   | -32.1 (10.4) | (reference)     |                     |
| Always                                                     | 221 | (28.4) | -31.0 (-38.1,-25.4) [-57.7,-3.3]  | -31.4 (9.6)  | 0.6             | (-2.2, 3.5)         |
| Stopped                                                    | 18  | (2.3)  | -28.7 (-33.4,-22.9) [-45.2,-16.6] | -28.5 (7.4)  | 3.6             | (-2.7, 9.8)         |
| Started                                                    | 137 | (17.6) | -33.6 (-40.1,-26.8) [-55.2,-12.2] | -33.9 (9.7)  | -1.9            | (-5.0, 1.2)         |
| Sometimes, initially no                                    | 186 | (23.9) | -32.0 (-39.4,-25.3) [-58.3,-0.3]  | -32.4 (9.8)  | -0.4            | (-3.3, 2.6)         |
| Sometimes, initially yes                                   | 105 | (13.5) | -29.3 (-34.8,-22.7) [-50.0,0.9]   | -28.7 (9.4)  | 3.3             | (-0.0, 6.6)         |
| <b>See nutritionist/dietitian</b><br>(n=770, R2=0.5%)      |     |        |                                   |              |                 |                     |
| Never                                                      | 633 | (82.2) | -32.0 (-38.4,-25.3) [-57.7,0.6]   | -31.6 (9.8)  | (reference)     |                     |
| Stopped                                                    | 121 | (15.7) | -31.8 (-37.4,-25.2) [-58.3,0.9]   | -31.5 (9.2)  | 0.2             | (-2.2, 2.5)         |
| Sometimes, initially no                                    | 9   | (1.2)  | -30.5 (-46.3,-20.3) [-55.7,-16.1] | -33.6 (14.3) | -1.9            | (-9.9, 6.0)         |
| Sometimes, initially yes                                   | 7   | (0.9)  | -45.2 (-51.3,-26.1) [-53.7,-0.3]  | -38.7 (19.2) | -7.0            | (-16.0,2.0)         |
| <b>See trainer/exercise specialist</b><br>(n=769, R2=0.7%) |     |        |                                   |              |                 |                     |
| Never                                                      | 673 | (87.5) | -32.0 (-38.3,-25.2) [-57.7,0.9]   | -31.6 (9.9)  | (reference)     |                     |
| Always                                                     | 2   | (0.3)  | -29.3 (-33.8,-24.8) [-33.8,-24.8] | -29.3 (6.3)  | 2.2             | (-15.6,20.1)        |
| Stopped                                                    | 26  | (3.4)  | -32.5 (-37.6,-26.4) [-58.3,-21.5] | -33.4 (9.5)  | -1.8            | (-6.9, 3.2)         |
| Started                                                    | 4   | (0.5)  | -30.8 (-43.5,-27.3) [-53.9,-26.0] | -35.4 (12.7) | -3.8            | (-16.5,8.9)         |
| Sometimes, initially no                                    | 58  | (7.5)  | -31.2 (-39.1,-23.9) [-53.7,-14.9] | -31.7 (9.8)  | -0.2            | (-3.6, 3.3)         |
| Sometimes, initially yes                                   | 6   | (0.8)  | -40.5 (-44.6,-33.6) [-45.6,-31.1] | -39.3 (5.9)  | -7.7            | (-18.1,2.6)         |
| <b>Count fat grams</b><br>(n=745, R2=1.7%)                 |     |        |                                   |              |                 |                     |
| Never                                                      | 612 | (82.1) | -31.7 (-38.1,-25.0) [-57.7,0.6]   | -31.4 (9.6)  | (reference)     |                     |
| Always                                                     | 3   | (0.4)  | -44.0 (-53.7,-29.5) [-53.7,-29.5] | -42.4 (12.2) | -11.0           | (-25.4,3.4)         |
| Stopped                                                    | 14  | (1.9)  | -32.7 (-36.4,-28.5) [-48.7,-16.6] | -32.8 (9.1)  | -1.5            | (-8.2, 5.3)         |
| Started                                                    | 5   | (0.7)  | -38.8 (-50.0,-37.9) [-54.0,-29.0] | -41.9 (10.1) | -10.6           | (-21.7,0.6)         |
| Sometimes, initially no                                    | 94  | (12.6) | -32.7 (-40.9,-25.5) [-54.5,-11.3] | -32.9 (10.7) | -1.6            | (-4.3, 1.2)         |
| Sometimes, initially yes                                   | 17  | (2.3)  | -27.0 (-34.2,-21.8) [-45.6,-8.1]  | -28.8 (10.2) | 2.6             | (-3.5, 8.7)         |
| <b>Decrease fat intake</b><br>(n=748, R2=1.0%)             |     |        |                                   |              |                 |                     |
| Never                                                      | 319 | (42.6) | -31.2 (-38.0,-23.7) [-57.5,0.9]   | -30.7 (10.4) | (reference)     |                     |
| Always                                                     | 15  | (2.0)  | -34.0 (-44.0,-24.0) [-54.5,-14.9] | -33.6 (12.6) | -2.9            | (-9.6, 3.8)         |
| Stopped                                                    | 24  | (3.2)  | -30.7 (-38.4,-23.9) [-44.5,-15.8] | -30.6 (8.7)  | 0.2             | (-5.2, 5.5)         |
| Started                                                    | 28  | (3.7)  | -29.4 (-39.0,-25.2) [-50.0,-18.6] | -31.6 (8.4)  | -0.9            | (-5.9, 4.1)         |
| Sometimes, initially no                                    | 289 | (38.6) | -32.5 (-38.8,-26.5) [-58.3,-9.1]  | -32.8 (9.5)  | -2.0            | (-4.1, 0.0)         |
| Sometimes, initially yes                                   | 73  | (9.8)  | -32.0 (-37.9,-26.1) [-53.7,-8.1]  | -31.5 (9.3)  | -0.7            | (-4.0, 2.6)         |

| Factor                                                     | n   | (%)    | Median (IQR) [range]              | Mean (SD)    | Mean Difference | Simultaneous 95% CI |
|------------------------------------------------------------|-----|--------|-----------------------------------|--------------|-----------------|---------------------|
| <b>Reduce number of calories eaten</b> (n=731, R2=0.5%)    |     |        |                                   |              |                 |                     |
| Never                                                      | 311 | (42.5) | -31.9 (-38.4,-24.8) [-57.7,0.9]   | -31.7 (10.3) | (reference)     |                     |
| Always                                                     | 8   | (1.1)  | -31.5 (-46.7,-25.5) [-54.5,-18.1] | -35.0 (13.7) |                 | -3.3 (-12.4,5.8)    |
| Stopped                                                    | 37  | (5.1)  | -29.4 (-36.2,-24.4) [-48.7,-0.3]  | -29.6 (10.1) |                 | 2.1 (-2.3, 6.5)     |
| Started                                                    | 18  | (2.5)  | -33.4 (-38.8,-28.9) [-50.0,-18.6] | -33.6 (7.9)  |                 | -1.9 (-8.0, 4.3)    |
| Sometimes, initially no                                    | 295 | (40.4) | -32.1 (-39.1,-25.4) [-58.3,-9.2]  | -32.1 (9.5)  |                 | -0.4 (-2.4, 1.7)    |
| Sometimes, initially yes                                   | 62  | (8.5)  | -29.9 (-37.9,-25.6) [-53.7,-12.0] | -31.2 (9.3)  |                 | 0.6 (-2.9, 4.1)     |
| <b>Use a very low calorie diet</b> (n=721, R2=0.0%)        |     |        |                                   |              |                 |                     |
| Never                                                      | 686 | (95.1) | -32.1 (-38.8,-25.4) [-58.3,0.9]   | -31.8 (10.0) | (reference)     |                     |
| Stopped                                                    | 35  | (4.9)  | -29.4 (-36.0,-25.2) [-53.7,-8.1]  | -30.9 (9.6)  |                 | 0.9 (-2.5, 4.3)     |
| <b>Cut out between-meal-snacking</b> (n=710, R2=0.7%)      |     |        |                                   |              |                 |                     |
| Never                                                      | 468 | (65.9) | -31.3 (-38.1,-24.6) [-57.7,0.9]   | -31.4 (9.9)  | (reference)     |                     |
| Always                                                     | 2   | (0.3)  | -33.9 (-36.0,-31.7) [-36.0,-31.7] | -33.9 (3.0)  |                 | -2.5 (-20.1,15.2)   |
| Stopped                                                    | 49  | (6.9)  | -30.7 (-39.4,-25.6) [-51.7,-0.3]  | -31.4 (10.8) |                 | -0.0 (-3.8, 3.7)    |
| Started                                                    | 6   | (0.8)  | -38.3 (-46.9,-28.9) [-48.2,-22.6] | -37.2 (10.0) |                 | -5.8 (-16.0,4.4)    |
| Sometimes, initially no                                    | 165 | (23.2) | -32.3 (-39.2,-26.5) [-54.5,-10.1] | -32.9 (9.5)  |                 | -1.5 (-3.7, 0.8)    |
| Sometimes, initially yes                                   | 20  | (2.8)  | -30.4 (-38.8,-26.3) [-44.0,-24.8] | -32.5 (6.8)  |                 | -1.1 (-6.8, 4.6)    |
| <b>Eat fewer high carbohydrate foods</b> (n=753, R2=0.9%)  |     |        |                                   |              |                 |                     |
| Never                                                      | 290 | (38.5) | -31.2 (-38.1,-24.6) [-57.7,0.9]   | -31.4 (10.3) | (reference)     |                     |
| Always                                                     | 16  | (2.1)  | -27.3 (-37.0,-24.8) [-41.0,-14.9] | -29.1 (7.9)  |                 | 2.3 (-4.1, 8.8)     |
| Stopped                                                    | 33  | (4.4)  | -30.1 (-36.2,-22.9) [-51.7,-3.3]  | -29.0 (10.1) |                 | 2.4 (-2.3, 7.0)     |
| Started                                                    | 31  | (4.1)  | -33.1 (-38.0,-26.4) [-53.9,-12.0] | -32.8 (9.1)  |                 | -1.4 (-6.1, 3.3)    |
| Sometimes, initially no                                    | 317 | (42.1) | -32.4 (-39.4,-25.9) [-58.3,-9.1]  | -32.6 (9.5)  |                 | -1.2 (-3.3, 0.8)    |
| Sometimes, initially yes                                   | 66  | (8.8)  | -31.8 (-37.4,-26.4) [-54.0,-8.1]  | -31.7 (9.4)  |                 | -0.3 (-3.7, 3.1)    |
| <b>Eat special low calorie diet foods</b> (n=738, R2=0.7%) |     |        |                                   |              |                 |                     |
| Never                                                      | 472 | (64.0) | -31.4 (-38.4,-24.1) [-57.7,0.9]   | -31.2 (10.1) | (reference)     |                     |
| Always                                                     | 4   | (0.5)  | -26.2 (-30.2,-22.8) [-34.0,-19.6] | -26.5 (5.9)  |                 | 4.8 (-7.9, 17.4)    |
| Stopped                                                    | 27  | (3.7)  | -33.0 (-36.8,-26.9) [-48.7,-20.6] | -32.9 (7.0)  |                 | -1.7 (-6.7, 3.3)    |
| Started                                                    | 11  | (1.5)  | -28.9 (-38.8,-23.8) [-44.3,-19.4] | -30.8 (8.4)  |                 | 0.5 (-7.2, 8.1)     |
| Sometimes, initially no                                    | 183 | (24.8) | -32.2 (-39.2,-26.3) [-58.3,-10.1] | -32.9 (9.4)  |                 | -1.7 (-3.9, 0.5)    |
| Sometimes, initially yes                                   | 41  | (5.6)  | -31.8 (-37.9,-26.3) [-54.0,-8.1]  | -31.5 (10.5) |                 | -0.3 (-4.4, 3.8)    |
| <b>Eat or drink meal replacements</b> (n=738, R2=1.6%)     |     |        |                                   |              |                 |                     |
| Never                                                      | 564 | (76.4) | -31.2 (-38.1,-25.0) [-58.3,0.6]   | -31.4 (9.8)  | (reference)     |                     |
| Always                                                     | 1   | (0.1)  | -20.2 (-20.2,-20.2) [-20.2,-20.2] | -20.2 (.)    |                 | 11.2 (-13.8,36.3)   |
| Stopped                                                    | 12  | (1.6)  | -32.5 (-34.9,-25.2) [-39.9,-8.1]  | -29.2 (9.4)  |                 | 2.2 (-5.1, 9.6)     |
| Started                                                    | 12  | (1.6)  | -34.6 (-42.4,-26.4) [-48.2,-19.4] | -33.9 (9.3)  |                 | -2.5 (-9.9, 4.8)    |
| Sometimes, initially no                                    | 137 | (18.6) | -34.2 (-40.6,-26.9) [-54.5,0.9]   | -33.8 (10.0) |                 | -2.4 (-4.8, -0.0)   |
| Sometimes, initially yes                                   | 12  | (1.6)  | -27.8 (-33.4,-24.7) [-44.0,-3.3]  | -27.3 (10.9) |                 | 4.1 (-3.2, 11.5)    |

| Factor                                                        | n   | (%)    | Median (IQR) [range]              | Mean (SD)    | Mean Difference | Simultaneous 95% CI |
|---------------------------------------------------------------|-----|--------|-----------------------------------|--------------|-----------------|---------------------|
| <b>Increase fruits and vegetables</b><br>(n=729, R2=0.4%)     |     |        |                                   |              |                 |                     |
| Never                                                         | 293 | (40.2) | -31.8 (-38.6,-25.1) [-58.3,0.9]   | -31.6 (10.3) | (reference)     |                     |
| Always                                                        | 15  | (2.1)  | -26.3 (-32.1,-25.1) [-54.5,-17.0] | -28.7 (8.7)  | 3.0             | (-3.8, 9.7)         |
| Stopped                                                       | 42  | (5.8)  | -31.6 (-38.9,-22.9) [-52.8,-0.3]  | -30.9 (11.0) | 0.8             | (-3.4, 5.0)         |
| Started                                                       | 18  | (2.5)  | -33.5 (-39.9,-24.1) [-48.2,-18.5] | -32.8 (9.3)  | -1.1            | (-7.3, 5.0)         |
| Sometimes, initially no                                       | 274 | (37.6) | -32.4 (-39.1,-26.3) [-53.9,-9.1]  | -32.4 (9.7)  | -0.8            | (-2.9, 1.4)         |
| Sometimes, initially yes                                      | 87  | (11.9) | -32.9 (-38.3,-26.0) [-55.0,-8.1]  | -32.1 (9.1)  | -0.5            | (-3.6, 2.6)         |
| <b>Cut out sugar-sweetened beverages</b><br>(n=732, R2=0.2%)  |     |        |                                   |              |                 |                     |
| Never                                                         | 161 | (22.0) | -32.0 (-39.5,-25.5) [-57.7,-6.7]  | -32.5 (10.0) | (reference)     |                     |
| Always                                                        | 58  | (7.9)  | -30.5 (-39.3,-24.0) [-53.7,-10.1] | -31.5 (10.0) | 1.0             | (-2.9, 4.9)         |
| Stopped                                                       | 37  | (5.1)  | -31.4 (-38.1,-24.5) [-55.0,-12.5] | -31.7 (9.7)  | 0.7             | (-3.9, 5.4)         |
| Started                                                       | 48  | (6.6)  | -31.9 (-38.3,-24.9) [-54.0,-16.3] | -32.2 (9.6)  | 0.2             | (-3.9, 4.4)         |
| Sometimes, initially no                                       | 286 | (39.1) | -32.0 (-38.3,-25.2) [-58.3,0.9]   | -31.5 (10.2) | 1.0             | (-1.5, 3.5)         |
| Sometimes, initially yes                                      | 142 | (19.4) | -31.5 (-37.5,-25.8) [-52.8,-3.3]  | -31.2 (9.8)  | 1.3             | (-1.6, 4.2)         |
| <b>Keep a food diary</b><br>(n=751, R2=0.6%)                  |     |        |                                   |              |                 |                     |
| Never                                                         | 646 | (86.0) | -31.6 (-38.1,-25.0) [-58.3,0.9]   | -31.5 (9.9)  | (reference)     |                     |
| Stopped                                                       | 57  | (7.6)  | -33.0 (-37.9,-27.6) [-54.5,-3.3]  | -32.8 (9.3)  | -1.3            | (-4.7, 2.1)         |
| Started                                                       | 1   | (0.1)  | -25.6 (-25.6,-25.6) [-25.6,-25.6] | -25.6 (.)    | 5.9             | (-18.7,30.5)        |
| Sometimes, initially no                                       | 40  | (5.3)  | -34.5 (-42.9,-26.4) [-53.7,-13.0] | -34.6 (10.6) | -3.1            | (-7.1, 0.9)         |
| Sometimes, initially yes                                      | 7   | (0.9)  | -33.3 (-40.5,-26.5) [-41.1,-20.2] | -32.1 (7.6)  | -0.6            | (-9.9, 8.7)         |
| <b>Eat breakfast regularly (6-7/week)</b><br>(n=782, R2=1.3%) |     |        |                                   |              |                 |                     |
| Never                                                         | 95  | (12.1) | -30.4 (-38.2,-25.2) [-58.3,-7.8]  | -31.5 (10.2) | (reference)     |                     |
| Always                                                        | 333 | (42.6) | -31.4 (-37.6,-24.8) [-57.7,0.6]   | -30.9 (9.6)  | 0.6             | (-2.3, 3.5)         |
| Stopped                                                       | 22  | (2.8)  | -33.2 (-44.0,-24.2) [-57.5,-12.7] | -33.4 (13.0) | -1.9            | (-7.7, 4.0)         |
| Started                                                       | 116 | (14.8) | -32.9 (-40.7,-27.1) [-55.2,-12.4] | -33.9 (9.3)  | -2.4            | (-5.8, 1.0)         |
| Sometimes, initially no                                       | 131 | (16.8) | -32.6 (-38.4,-25.7) [-54.5,-9.2]  | -32.0 (10.1) | -0.5            | (-3.8, 2.8)         |
| Sometimes, initially yes                                      | 85  | (10.9) | -29.8 (-37.6,-23.9) [-54.0,0.9]   | -30.3 (9.8)  | 1.2             | (-2.5, 4.9)         |
| <b>Eat lunch regularly (6-7/week)</b><br>(n=784, R2=1.7%)     |     |        |                                   |              |                 |                     |
| Never                                                         | 20  | (2.6)  | -31.5 (-42.4,-25.3) [-55.7,-12.1] | -32.8 (11.6) | (reference)     |                     |
| Always                                                        | 456 | (58.2) | -31.8 (-38.3,-25.0) [-58.3,0.9]   | -31.7 (9.7)  | 1.1             | (-4.2, 6.5)         |
| Stopped                                                       | 15  | (1.9)  | -30.8 (-39.7,-21.6) [-57.5,-12.7] | -30.8 (12.2) | 2.0             | (-5.9, 10.0)        |
| Started                                                       | 96  | (12.2) | -34.8 (-40.9,-28.5) [-53.4,-10.1] | -34.5 (9.6)  | -1.6            | (-7.4, 4.1)         |
| Sometimes, initially no                                       | 81  | (10.3) | -29.4 (-36.9,-23.2) [-50.0,-7.8]  | -29.6 (10.0) | 3.2             | (-2.6, 9.0)         |
| Sometimes, initially yes                                      | 116 | (14.8) | -30.2 (-35.8,-24.6) [-51.3,-8.1]  | -30.5 (9.5)  | 2.4             | (-3.3, 8.0)         |

| Factor                                                         | n   | (%)    | Median (IQR) [range]              | Mean (SD)    | Mean Difference | Simultaneous 95% CI |
|----------------------------------------------------------------|-----|--------|-----------------------------------|--------------|-----------------|---------------------|
| <b>Eat dinner regularly (6-7/week)</b><br>(n=784, R2=0.9%)     |     |        |                                   |              |                 |                     |
| Never                                                          | 3   | (0.4)  | -22.7 (-32.6,-18.2) [-32.6,-18.2] | -24.5 (7.4)  | (reference)     |                     |
| Always                                                         | 635 | (81.0) | -32.2 (-38.5,-25.4) [-58.3,0.9]   | -32.0 (9.8)  | -7.5            | (-20.8,5.8)         |
| Stopped                                                        | 2   | (0.3)  | -41.4 (-44.5,-38.3) [-44.5,-38.3] | -41.4 (4.4)  | -16.9           | (-37.8,4.1)         |
| Started                                                        | 36  | (4.6)  | -31.5 (-40.8,-20.9) [-51.9,-12.0] | -30.5 (10.9) | -6.0            | (-19.8,7.8)         |
| Sometimes, initially no                                        | 16  | (2.0)  | -28.9 (-35.9,-24.6) [-44.8,-12.7] | -29.4 (8.2)  | -4.9            | (-19.3,9.6)         |
| Sometimes, initially yes                                       | 92  | (11.7) | -30.6 (-36.7,-23.8) [-57.5,-9.2]  | -30.3 (10.3) | -5.8            | (-19.2,7.7)         |
| <b>Eat breakfast, lunch, dinner regularly</b> (n=775, R2=1.2%) |     |        |                                   |              |                 |                     |
| Never                                                          | 130 | (16.8) | -30.0 (-38.3,-24.2) [-58.3,-7.8]  | -31.2 (10.3) | (reference)     |                     |
| Always                                                         | 240 | (31.0) | -32.1 (-37.9,-24.8) [-57.7,0.6]   | -31.1 (9.6)  | 0.1             | (-2.7, 2.8)         |
| Stopped                                                        | 17  | (2.2)  | -30.8 (-35.4,-22.9) [-57.5,-12.7] | -32.1 (11.9) | -0.9            | (-7.3, 5.6)         |
| Started                                                        | 125 | (16.1) | -33.3 (-40.5,-27.4) [-55.2,-11.3] | -33.9 (9.5)  | -2.7            | (-5.9, 0.4)         |
| Sometimes, initially no                                        | 166 | (21.4) | -31.9 (-38.1,-26.1) [-54.5,-9.2]  | -31.6 (9.9)  | -0.4            | (-3.3, 2.5)         |
| Sometimes, initially yes                                       | 97  | (12.5) | -31.5 (-37.5,-23.6) [-54.0,0.9]   | -30.3 (10.1) | 0.9             | (-2.4, 4.3)         |
| <b>Eat when not hungry</b><br>(n=789, R2=2.8%)                 |     |        |                                   |              |                 |                     |
| Never                                                          | 439 | (55.6) | -32.2 (-38.9,-25.3) [-58.3,-6.7]  | -32.0 (9.7)  | (reference)     |                     |
| Always                                                         | 19  | (2.4)  | -28.6 (-36.5,-21.2) [-49.2,0.9]   | -27.9 (12.8) | 4.1             | (-1.7, 10.0)        |
| Stopped                                                        | 198 | (25.1) | -32.6 (-39.2,-26.7) [-55.2,-10.1] | -33.1 (9.1)  | -1.1            | (-3.2, 1.0)         |
| Started                                                        | 5   | (0.6)  | -22.9 (-34.6,-15.1) [-36.4,-0.3]  | -21.9 (14.9) | 10.2            | (-1.1, 21.4)        |
| Sometimes, initially no                                        | 41  | (5.2)  | -27.9 (-35.6,-20.8) [-45.4,-3.3]  | -28.0 (10.1) | 4.1             | (-0.0, 8.1)         |
| Sometimes, initially yes                                       | 87  | (11.0) | -29.2 (-36.9,-23.1) [-53.9,0.6]   | -29.5 (10.1) | 2.5             | (-0.4, 5.4)         |
| <b>Eat when feel full</b><br>(n=797, R2=2.6%)                  |     |        |                                   |              |                 |                     |
| Never                                                          | 519 | (65.1) | -32.2 (-38.8,-25.3) [-58.3,-3.3]  | -32.0 (9.7)  | (reference)     |                     |
| Always                                                         | 5   | (0.6)  | -28.6 (-30.0,-28.2) [-49.2,-26.1] | -32.4 (9.5)  | -0.5            | (-11.7,10.7)        |
| Stopped                                                        | 165 | (20.7) | -33.0 (-39.1,-26.7) [-55.2,-10.1] | -33.1 (9.2)  | -1.2            | (-3.4, 1.1)         |
| Started                                                        | 2   | (0.3)  | -26.4 (-36.4,-16.4) [-36.4,-16.4] | -26.4 (14.2) | 5.5             | (-12.1,23.2)        |
| Sometimes, initially no                                        | 37  | (4.6)  | -27.9 (-33.3,-19.6) [-51.0,-0.3]  | -26.0 (10.2) | 6.0             | (1.7, 10.2)         |
| Sometimes, initially yes                                       | 69  | (8.7)  | -29.2 (-36.9,-22.9) [-53.9,0.9]   | -29.4 (11.3) | 2.6             | (-0.6, 5.8)         |
| <b>Eat continuously during the day</b> (n=756, R2=5.2%)        |     |        |                                   |              |                 |                     |
| Never                                                          | 170 | (22.5) | -34.4 (-40.8,-26.7) [-57.7,-14.7] | -34.3 (9.2)  | (reference)     |                     |
| Always                                                         | 155 | (20.5) | -30.0 (-36.5,-24.4) [-53.9,-0.3]  | -29.7 (9.8)  | 4.6             | (1.9, 7.3)          |
| Stopped                                                        | 78  | (10.3) | -34.2 (-40.5,-29.5) [-53.7,-11.2] | -34.5 (9.5)  | -0.1            | (-3.5, 3.2)         |
| Started                                                        | 54  | (7.1)  | -25.8 (-33.4,-21.2) [-45.4,-12.0] | -27.1 (8.2)  | 7.2             | (3.4, 11.0)         |
| Sometimes, initially no                                        | 150 | (19.8) | -29.5 (-38.1,-23.6) [-55.2,0.6]   | -30.5 (9.9)  | 3.8             | (1.1, 6.5)          |
| Sometimes, initially yes                                       | 149 | (19.7) | -32.6 (-38.0,-25.4) [-55.0,0.9]   | -31.9 (9.8)  | 2.5             | (-0.3, 5.2)         |

| Factor                                            | n   | (%)    | Median (IQR) [range]              | Mean (SD)    | Mean Difference   | Simultaneous 95% CI |
|---------------------------------------------------|-----|--------|-----------------------------------|--------------|-------------------|---------------------|
| <b>Binge eating</b><br>(n=764, R2=2.0%)           |     |        |                                   |              |                   |                     |
| Never                                             | 551 | (72.1) | -32.2 (-39.1,-25.5) [-58.3,0.6]   | -32.2 (9.7)  | (reference)       |                     |
| Always                                            | 4   | (0.5)  | -18.6 (-27.4,-10.1) [-28.6,-9.1]  | -18.7 (10.1) | 13.5 (1.0, 25.9)  |                     |
| Stopped                                           | 136 | (17.8) | -32.2 (-38.1,-24.9) [-53.7,-3.3]  | -31.8 (9.6)  | 0.4 (-2.0, 2.8)   |                     |
| Started                                           | 2   | (0.3)  | -18.3 (-36.4,-0.3) [-36.4,-0.3]   | -18.3 (25.6) | 13.8 (-3.8, 31.5) |                     |
| Sometimes, initially no                           | 32  | (4.2)  | -29.5 (-35.2,-22.8) [-45.7,-12.1] | -29.1 (9.2)  | 3.1 (-1.4, 7.7)   |                     |
| Sometimes, initially yes                          | 39  | (5.1)  | -28.3 (-34.4,-23.1) [-53.9,-12.5] | -30.1 (9.9)  | 2.1 (-2.0, 6.2)   |                     |
| <b>Binge eating disorder</b><br>(n=766, R2=2.0%)  |     |        |                                   |              |                   |                     |
| Never                                             | 629 | (82.1) | -32.2 (-38.9,-25.4) [-58.3,0.6]   | -32.1 (9.7)  | (reference)       |                     |
| Stopped                                           | 90  | (11.7) | -32.4 (-37.8,-25.2) [-53.9,-12.1] | -32.1 (9.7)  | 0.0 (-2.7, 2.7)   |                     |
| Started                                           | 2   | (0.3)  | -18.3 (-36.4,-0.3) [-36.4,-0.3]   | -18.3 (25.6) | 13.7 (-3.4, 30.8) |                     |
| Sometimes, initially no                           | 26  | (3.4)  | -27.2 (-32.6,-21.2) [-39.6,-12.1] | -25.9 (7.8)  | 6.2 (1.3, 11.0)   |                     |
| Sometimes, initially yes                          | 19  | (2.5)  | -27.6 (-31.2,-23.0) [-50.7,-11.1] | -29.1 (10.7) | 3.0 (-2.6, 8.6)   |                     |
| <b>Loss of control eating</b><br>(n=744, R2=5.4%) |     |        |                                   |              |                   |                     |
| Never                                             | 336 | (45.2) | -33.3 (-39.9,-25.6) [-57.7,0.9]   | -32.9 (9.9)  | (reference)       |                     |
| Always                                            | 64  | (8.6)  | -28.8 (-35.3,-25.4) [-48.3,-0.3]  | -28.2 (9.5)  | 4.7 (1.4, 8.1)    |                     |
| Stopped                                           | 72  | (9.7)  | -34.9 (-41.1,-29.4) [-53.7,-11.2] | -35.5 (8.8)  | -2.5 (-5.7, 0.7)  |                     |
| Started                                           | 23  | (3.1)  | -27.2 (-32.9,-24.6) [-40.6,-10.1] | -27.6 (7.8)  | 5.4 (0.1, 10.7)   |                     |
| Sometimes, initially no                           | 129 | (17.3) | -27.2 (-34.9,-22.3) [-53.7,-10.1] | -28.7 (9.5)  | 4.2 (1.7, 6.7)    |                     |
| Sometimes, initially yes                          | 120 | (16.1) | -32.7 (-37.4,-25.2) [-55.0,-7.8]  | -31.8 (9.3)  | 1.2 (-1.5, 3.8)   |                     |
| <b>Night eating syndrome</b><br>(n=515, R2=1.5%)  |     |        |                                   |              |                   |                     |
| Never                                             | 380 | (73.8) | -32.9 (-39.5,-25.6) [-57.7,0.6]   | -32.7 (10.0) | (reference)       |                     |
| Always                                            | 8   | (1.6)  | -25.5 (-38.0,-22.4) [-47.4,-11.1] | -28.8 (11.9) | 3.9 (-5.3, 13.1)  |                     |
| Stopped                                           | 38  | (7.4)  | -31.5 (-36.2,-26.0) [-49.8,-12.2] | -31.1 (8.8)  | 1.6 (-2.8, 6.0)   |                     |
| Started                                           | 2   | (0.4)  | -37.2 (-42.3,-32.0) [-42.3,-32.0] | -37.2 (7.3)  | -4.4 (-22.7,13.8) |                     |
| Sometimes, initially no                           | 60  | (11.7) | -31.3 (-38.5,-22.5) [-45.4,0.9]   | -29.4 (10.7) | 3.3 (-0.2, 6.9)   |                     |
| Sometimes, initially yes                          | 27  | (5.2)  | -33.4 (-39.5,-26.1) [-50.7,-9.2]  | -32.3 (10.6) | 0.4 (-4.7, 5.5)   |                     |
| <b>Alcohol use disorder</b><br>(n=786, R2=1.6%)   |     |        |                                   |              |                   |                     |
| Never                                             | 644 | (81.9) | -31.6 (-38.6,-24.9) [-58.3,0.9]   | -31.5 (10.0) | (reference)       |                     |
| Always                                            | 15  | (1.9)  | -32.2 (-34.4,-22.9) [-50.7,-10.1] | -29.9 (11.0) | 1.6 (-4.9, 8.2)   |                     |
| Stopped                                           | 14  | (1.8)  | -40.3 (-45.0,-33.0) [-50.0,-24.6] | -38.4 (8.3)  | -6.9 (-13.6,-0.1) |                     |
| Started                                           | 17  | (2.2)  | -37.9 (-39.7,-28.7) [-51.4,-12.5] | -35.5 (9.7)  | -3.9 (-10.1,2.2)  |                     |
| Sometimes, initially no                           | 76  | (9.7)  | -31.0 (-36.3,-25.9) [-48.3,-0.3]  | -31.2 (8.0)  | 0.3 (-2.8, 3.3)   |                     |
| Sometimes, initially yes                          | 20  | (2.5)  | -34.3 (-40.2,-30.2) [-51.0,-18.0] | -35.3 (8.6)  | -3.8 (-9.5, 1.9)  |                     |

| Factor                                                       | n   | (%)    | Median (IQR) [range]              | Mean (SD)    | Mean Difference | Simultaneous 95% CI |
|--------------------------------------------------------------|-----|--------|-----------------------------------|--------------|-----------------|---------------------|
| <b>Drink any alcohol</b><br>(n=794, R2=0.3%)                 |     |        |                                   |              |                 |                     |
| Never                                                        | 225 | (28.3) | -31.8 (-38.8,-24.0) [-57.5,0.9]   | -31.3 (10.5) | (reference)     |                     |
| Always                                                       | 331 | (41.7) | -32.2 (-38.3,-25.6) [-55.2,-7.8]  | -32.1 (9.3)  | -0.9            | (-3.1, 1.3)         |
| Stopped                                                      | 35  | (4.4)  | -31.8 (-40.6,-24.7) [-57.7,-16.6] | -33.0 (10.6) | -1.7            | (-6.3, 2.9)         |
| Started                                                      | 30  | (3.8)  | -30.8 (-34.6,-23.1) [-58.3,-17.3] | -30.7 (9.1)  | 0.6             | (-4.3, 5.5)         |
| Sometimes, initially no                                      | 78  | (9.8)  | -32.1 (-37.9,-25.0) [-51.9,-0.3]  | -31.0 (9.6)  | 0.3             | (-3.0, 3.6)         |
| Sometimes, initially yes                                     | 95  | (12.0) | -31.8 (-40.1,-25.5) [-52.8,0.6]   | -31.7 (10.4) | -0.4            | (-3.5, 2.7)         |
| <b>Drink alcohol regularly</b><br>(2+/week) (n=794, R2=0.9%) |     |        |                                   |              |                 |                     |
| Never                                                        | 646 | (81.4) | -31.8 (-38.9,-25.0) [-58.3,0.9]   | -31.7 (10.1) | (reference)     |                     |
| Always                                                       | 32  | (4.0)  | -29.4 (-34.6,-22.8) [-49.2,-7.8]  | -28.6 (9.5)  | 3.2             | (-1.4, 7.7)         |
| Stopped                                                      | 7   | (0.9)  | -35.1 (-49.0,-33.7) [-50.0,-33.3] | -38.9 (7.3)  | -7.2            | (-16.7,2.4)         |
| Started                                                      | 15  | (1.9)  | -31.6 (-39.7,-24.5) [-48.7,-12.2] | -31.9 (9.6)  | -0.2            | (-6.8, 6.4)         |
| Sometimes, initially no                                      | 82  | (10.3) | -32.1 (-37.4,-26.5) [-48.4,-10.1] | -31.6 (8.0)  | 0.1             | (-2.8, 3.1)         |
| Sometimes, initially yes                                     | 12  | (1.5)  | -28.6 (-42.2,-26.1) [-51.4,-20.2] | -33.5 (10.9) | -1.7            | (-9.0, 5.6)         |
| <b>Smoker</b><br>(n=833, R2=2.3%)                            |     |        |                                   |              |                 |                     |
| Never                                                        | 742 | (89.1) | -31.4 (-38.1,-24.8) [-57.7,0.9]   | -31.3 (9.9)  | (reference)     |                     |
| Always                                                       | 7   | (0.8)  | -38.3 (-48.4,-29.6) [-48.7,-23.9] | -38.6 (9.6)  | -7.3            | (-16.8,2.2)         |
| Stopped                                                      | 1   | (0.1)  | -28.8 (-28.8,-28.8) [-28.8,-28.8] | -28.8 (.)    | 2.5             | (-22.6,27.5)        |
| Started                                                      | 38  | (4.6)  | -36.2 (-44.3,-28.5) [-57.5,-14.9] | -36.7 (10.5) | -5.5            | (-9.6, -1.3)        |
| Sometimes, initially no                                      | 43  | (5.2)  | -34.4 (-37.5,-28.5) [-58.3,-12.0] | -34.0 (8.5)  | -2.8            | (-6.7, 1.1)         |
| Sometimes, initially yes                                     | 2   | (0.2)  | -41.8 (-43.9,-39.7) [-43.9,-39.7] | -41.8 (3.0)  | -10.6           | (-28.3,7.2)         |
| <b>Illegal drug use</b><br>(n=787, R2=0.2%)                  |     |        |                                   |              |                 |                     |
| Never                                                        | 731 | (92.9) | -31.9 (-38.3,-25.2) [-58.3,0.6]   | -31.7 (9.8)  | (reference)     |                     |
| Always                                                       | 8   | (1.0)  | -32.9 (-43.9,-27.0) [-48.3,-18.4] | -34.3 (10.6) | -2.6            | (-11.5,6.3)         |
| Stopped                                                      | 13  | (1.7)  | -26.7 (-35.4,-23.9) [-46.3,-15.3] | -29.6 (9.3)  | 2.1             | (-4.9, 9.1)         |
| Started                                                      | 5   | (0.6)  | -37.4 (-39.7,-27.4) [-43.1,-25.3] | -34.6 (7.8)  | -2.9            | (-14.1,8.4)         |
| Sometimes, initially no                                      | 26  | (3.3)  | -32.6 (-38.5,-25.2) [-57.5,-8.1]  | -32.3 (10.8) | -0.5            | (-5.6, 4.5)         |
| Sometimes, initially yes                                     | 4   | (0.5)  | -33.0 (-45.7,-22.9) [-48.4,-22.9] | -34.3 (13.3) | -2.6            | (-15.2,10.0)        |



**eTable 4. For LAGB (n=509), unadjusted relationship between the change in each predictor and 3-year percent weight change.**

| Factor                                                     | n   | (%)    | Median (IQR) [range]              | Mean (SD)    | Mean Difference   | Simultaneous 95% CI |
|------------------------------------------------------------|-----|--------|-----------------------------------|--------------|-------------------|---------------------|
| <b>Self-weigh at least weekly</b><br>(n=270, R2=4.1%)      |     |        |                                   |              |                   |                     |
| Never                                                      | 44  | (16.3) | -13.7 (-21.3,-7.3) [-38.1,11.7]   | -14.5 (9.9)  | (reference)       |                     |
| Always                                                     | 89  | (33.0) | -18.3 (-24.9,-11.1) [-56.1,12.5]  | -17.8 (11.0) | -3.3 (-8.4, 1.9)  |                     |
| Stopped                                                    | 5   | (1.9)  | -16.9 (-20.8,-4.2) [-29.8,2.1]    | -13.9 (12.8) | 0.6 (-12.5,13.7)  |                     |
| Started                                                    | 38  | (14.1) | -21.6 (-28.1,-17.0) [-48.4,11.3]  | -21.8 (12.1) | -7.3 (-13.4,-1.1) |                     |
| Sometimes, initially no                                    | 48  | (17.8) | -16.3 (-23.7,-10.1) [-49.2,2.8]   | -17.6 (11.1) | -3.0 (-8.8, 2.7)  |                     |
| Sometimes, initially yes                                   | 46  | (17.0) | -13.9 (-23.1,-7.8) [-35.0,4.2]    | -15.5 (10.3) | -1.0 (-6.8, 4.9)  |                     |
| <b>See nutritionist/dietitian</b><br>(n=267, R2=3.5%)      |     |        |                                   |              |                   |                     |
| Never                                                      | 231 | (86.5) | -16.7 (-25.5,-10.3) [-49.2,12.5]  | -17.6 (10.7) | (reference)       |                     |
| Stopped                                                    | 23  | (8.6)  | -17.1 (-23.9,-8.7) [-43.4,-0.6]   | -18.0 (11.1) | -0.3 (-6.2, 5.6)  |                     |
| Started                                                    | 1   | (0.4)  | 3.9 (3.9,3.9) [3.9,3.9]           | 3.9 (.)      | 21.6 (-5.5, 48.6) |                     |
| Sometimes, initially no                                    | 8   | (3.0)  | -15.1 (-19.9,-6.4) [-22.7,2.8]    | -12.8 (9.1)  | 4.8 (-4.9, 14.5)  |                     |
| Sometimes, initially yes                                   | 4   | (1.5)  | -19.8 (-38.2,-18.4) [-56.1,-17.5] | -28.3 (18.6) | -10.6 (-24.2,3.0) |                     |
| <b>See trainer/exercise specialist</b><br>(n=265, R2=1.1%) |     |        |                                   |              |                   |                     |
| Never                                                      | 226 | (85.3) | -16.5 (-24.5,-10.0) [-56.1,12.5]  | -17.4 (11.0) | (reference)       |                     |
| Always                                                     | 3   | (1.1)  | -17.3 (-28.1,-8.7) [-28.1,-8.7]   | -18.0 (9.7)  | -0.6 (-17.0,15.9) |                     |
| Stopped                                                    | 7   | (2.6)  | -21.7 (-30.3,-12.7) [-32.0,-0.8]  | -19.9 (10.8) | -2.5 (-13.3,8.4)  |                     |
| Started                                                    | 2   | (0.8)  | -29.8 (-43.4,-16.2) [-43.4,-16.2] | -29.8 (19.2) | -12.4 (-32.5,7.7) |                     |
| Sometimes, initially no                                    | 23  | (8.7)  | -18.7 (-26.5,-8.1) [-31.0,3.5]    | -16.7 (10.4) | 0.7 (-5.5, 6.9)   |                     |
| Sometimes, initially yes                                   | 4   | (1.5)  | -19.0 (-27.5,-8.4) [-28.5,-5.2]   | -17.9 (11.4) | -0.5 (-14.8,13.8) |                     |
| <b>Count fat grams</b><br>(n=261, R2=2.3%)                 |     |        |                                   |              |                   |                     |
| Never                                                      | 220 | (84.3) | -16.3 (-23.8,-9.6) [-56.1,12.5]   | -16.9 (11.0) | (reference)       |                     |
| Stopped                                                    | 4   | (1.5)  | -25.2 (-29.4,-19.0) [-30.3,-16.2] | -24.2 (6.5)  | -7.4 (-21.2,6.5)  |                     |
| Started                                                    | 2   | (0.8)  | -31.8 (-46.2,-17.5) [-46.2,-17.5] | -31.8 (20.3) | -15.0 (-34.6,4.6) |                     |
| Sometimes, initially no                                    | 30  | (11.5) | -18.8 (-27.9,-8.7) [-42.6,2.8]    | -17.5 (11.1) | -0.7 (-6.0, 4.7)  |                     |
| Sometimes, initially yes                                   | 5   | (1.9)  | -22.8 (-29.7,-17.0) [-33.7,-1.0]  | -20.9 (12.8) | -4.0 (-16.5,8.5)  |                     |
| <b>Decrease fat intake</b><br>(n=261, R2=3.9%)             |     |        |                                   |              |                   |                     |
| Never                                                      | 126 | (48.3) | -14.7 (-20.6,-8.9) [-56.1,12.5]   | -15.2 (11.1) | (reference)       |                     |
| Always                                                     | 4   | (1.5)  | -20.7 (-27.9,-18.0) [-33.1,-17.5] | -23.0 (7.1)  | -7.8 (-22.3,6.7)  |                     |
| Stopped                                                    | 11  | (4.2)  | -21.5 (-28.6,-11.1) [-32.0,-0.8]  | -19.4 (10.1) | -4.2 (-13.1,4.8)  |                     |
| Started                                                    | 9   | (3.4)  | -8.7 (-23.2,-8.1) [-31.3,-4.5]    | -15.0 (9.9)  | 0.2 (-9.6, 10.0)  |                     |
| Sometimes, initially no                                    | 93  | (35.6) | -19.7 (-26.5,-11.3) [-46.2,11.7]  | -19.3 (11.3) | -4.1 (-8.0, -0.2) |                     |
| Sometimes, initially yes                                   | 18  | (6.9)  | -22.3 (-30.6,-7.2) [-33.9,-1.0]   | -20.0 (11.7) | -4.8 (-12.0,2.4)  |                     |

| Factor                                                     | n   | (%)    | Median (IQR) [range]              | Mean (SD)    | Mean Difference | Simultaneous 95% CI |
|------------------------------------------------------------|-----|--------|-----------------------------------|--------------|-----------------|---------------------|
| <b>Reduce number of calories eaten (n=254, R2=3.6%)</b>    |     |        |                                   |              |                 |                     |
| Never                                                      | 113 | (44.5) | -14.9 (-22.7,-9.5) [-56.1,12.5]   | -15.8 (11.2) | (reference)     |                     |
| Always                                                     | 2   | (0.8)  | -27.2 (-31.5,-22.8) [-31.5,-22.8] | -27.2 (6.2)  |                 | -11.3 (-31.7,9.0)   |
| Stopped                                                    | 7   | (2.8)  | -6.4 (-16.7,-0.8) [-26.2,0.5]     | -9.1 (9.6)   |                 | 6.7 (-4.4, 17.8)    |
| Started                                                    | 11  | (4.3)  | -25.5 (-30.6,-11.4) [-31.6,-6.3]  | -21.6 (9.3)  |                 | -5.8 (-14.8,3.3)    |
| Sometimes, initially no                                    | 99  | (39.0) | -18.1 (-25.5,-10.0) [-48.4,11.7]  | -18.1 (11.4) |                 | -2.3 (-6.2, 1.7)    |
| Sometimes, initially yes                                   | 22  | (8.7)  | -16.6 (-29.7,-8.7) [-33.1,-1.0]   | -17.2 (10.3) |                 | -1.3 (-8.0, 5.3)    |
| <b>Use a very low calorie diet (n=252, R2=0.3%)</b>        |     |        |                                   |              |                 |                     |
| Never                                                      | 241 | (95.6) | -16.4 (-23.9,-9.3) [-56.1,12.5]   | -17.0 (11.2) | (reference)     |                     |
| Stopped                                                    | 11  | (4.4)  | -18.6 (-30.3,-16.2) [-32.0,-1.0]  | -20.1 (9.4)  |                 | -3.2 (-9.9, 3.5)    |
| <b>Cut out between-meal-snacking (n=245, R2=1.0%)</b>      |     |        |                                   |              |                 |                     |
| Never                                                      | 165 | (67.3) | -16.0 (-23.4,-9.9) [-56.1,12.5]   | -16.5 (11.2) | (reference)     |                     |
| Always                                                     | 1   | (0.4)  | -17.5 (-17.5,-17.5) [-17.5,-17.5] | -17.5 (.)    |                 | -1.0 (-29.8,27.8)   |
| Stopped                                                    | 7   | (2.9)  | -16.7 (-21.8,-7.0) [-26.5,-0.8]   | -14.6 (8.9)  |                 | 1.9 (-9.1, 13.0)    |
| Started                                                    | 6   | (2.4)  | -18.6 (-34.8,-8.1) [-38.1,-4.5]   | -20.5 (14.2) |                 | -4.0 (-15.9,8.0)    |
| Sometimes, initially no                                    | 61  | (24.9) | -19.2 (-26.5,-10.3) [-42.6,11.7]  | -18.6 (11.1) |                 | -2.1 (-6.4, 2.2)    |
| Sometimes, initially yes                                   | 5   | (2.0)  | -14.2 (-16.2,-11.9) [-30.6,-8.7]  | -16.3 (8.4)  |                 | 0.2 (-12.9,13.2)    |
| <b>Eat fewer high carbohydrate foods (n=257, R2=3.3%)</b>  |     |        |                                   |              |                 |                     |
| Never                                                      | 96  | (37.4) | -13.3 (-20.2,-7.0) [-56.1,12.5]   | -14.5 (11.4) | (reference)     |                     |
| Always                                                     | 2   | (0.8)  | -24.2 (-25.5,-22.8) [-25.5,-22.8] | -24.2 (1.9)  |                 | -9.7 (-29.7,10.3)   |
| Stopped                                                    | 6   | (2.3)  | -17.2 (-18.3,-11.7) [-26.2,-8.9]  | -16.6 (6.0)  |                 | -2.1 (-13.9,9.7)    |
| Started                                                    | 16  | (6.2)  | -17.1 (-31.5,-9.7) [-40.6,-4.5]   | -20.1 (11.5) |                 | -5.6 (-13.2,2.0)    |
| Sometimes, initially no                                    | 119 | (46.3) | -17.9 (-25.5,-10.1) [-48.4,11.7]  | -17.8 (10.6) |                 | -3.3 (-7.2, 0.5)    |
| Sometimes, initially yes                                   | 18  | (7.0)  | -17.8 (-28.6,-12.0) [-32.9,-1.0]  | -19.2 (9.7)  |                 | -4.7 (-11.9,2.5)    |
| <b>Eat special low calorie diet foods (n=253, R2=6.0%)</b> |     |        |                                   |              |                 |                     |
| Never                                                      | 165 | (65.2) | -14.7 (-21.8,-8.1) [-56.1,12.5]   | -15.3 (11.0) | (reference)     |                     |
| Always                                                     | 2   | (0.8)  | -29.8 (-33.1,-26.5) [-33.1,-26.5] | -29.8 (4.7)  |                 | -14.4 (-34.2,5.4)   |
| Stopped                                                    | 12  | (4.7)  | -15.1 (-17.4,-7.8) [-26.5,-0.8]   | -13.1 (7.8)  |                 | 2.2 (-6.1, 10.5)    |
| Started                                                    | 4   | (1.6)  | -15.7 (-27.1,-6.6) [-31.5,-4.5]   | -16.9 (12.5) |                 | -1.5 (-15.6,12.6)   |
| Sometimes, initially no                                    | 58  | (22.9) | -21.4 (-28.2,-13.5) [-46.2,2.8]   | -20.7 (10.4) |                 | -5.3 (-9.6, -1.1)   |
| Sometimes, initially yes                                   | 12  | (4.7)  | -17.0 (-28.4,-12.0) [-48.4,-3.2]  | -20.0 (12.6) |                 | -4.7 (-13.0,3.6)    |
| <b>Eat or drink meal replacements (n=261, R2=3.0%)</b>     |     |        |                                   |              |                 |                     |
| Never                                                      | 203 | (77.8) | -16.0 (-23.4,-8.7) [-56.1,12.5]   | -16.4 (11.0) | (reference)     |                     |
| Always                                                     | 1   | (0.4)  | -31.9 (-31.9,-31.9) [-31.9,-31.9] | -31.9 (.)    |                 | -15.4 (-43.8,12.9)  |
| Stopped                                                    | 3   | (1.1)  | -15.5 (-31.5,-10.1) [-31.5,-10.1] | -19.0 (11.2) |                 | -2.6 (-19.1,13.8)   |
| Started                                                    | 3   | (1.1)  | -18.1 (-46.2,-16.2) [-46.2,-16.2] | -26.8 (16.8) |                 | -10.4 (-26.9,6.1)   |
| Sometimes, initially no                                    | 48  | (18.4) | -20.3 (-28.4,-11.6) [-43.4,3.9]   | -19.2 (11.1) |                 | -2.8 (-7.4, 1.7)    |
| Sometimes, initially yes                                   | 3   | (1.1)  | -12.0 (-18.6,-0.8) [-18.6,-0.8]   | -10.4 (9.0)  |                 | 6.0 (-10.5,22.4)    |

| Factor                                                     | n   | (%)    | Median (IQR) [range]              | Mean (SD)    | Mean Difference | Simultaneous 95% CI |
|------------------------------------------------------------|-----|--------|-----------------------------------|--------------|-----------------|---------------------|
| <b>Increase fruits and vegetables</b> (n=257, R2=1.9%)     |     |        |                                   |              |                 |                     |
| Never                                                      | 142 | (55.3) | -15.6 (-22.3,-9.5) [-56.1,12.5]   | -15.9 (10.6) | (reference)     |                     |
| Always                                                     | 3   | (1.2)  | -18.1 (-18.6,-12.5) [-18.6,-12.5] | -16.4 (3.3)  | -0.5            | (-16.9,15.9)        |
| Stopped                                                    | 17  | (6.6)  | -16.2 (-26.2,-12.5) [-40.3,0.5]   | -17.6 (11.3) | -1.7            | (-8.9, 5.6)         |
| Started                                                    | 6   | (2.3)  | -18.5 (-31.5,-10.5) [-38.1,-8.1]  | -20.9 (11.8) | -5.0            | (-16.7,6.7)         |
| Sometimes, initially no                                    | 72  | (28.0) | -17.8 (-25.3,-10.0) [-48.4,3.9]   | -18.7 (11.3) | -2.8            | (-6.9, 1.2)         |
| Sometimes, initially yes                                   | 17  | (6.6)  | -19.8 (-29.7,-11.1) [-33.9,1.7]   | -19.3 (11.9) | -3.4            | (-10.7,3.8)         |
| <b>Cut out sugar-sweetened beverages</b> (n=256, R2=2.6%)  |     |        |                                   |              |                 |                     |
| Never                                                      | 62  | (24.2) | -15.4 (-22.0,-8.2) [-40.3,12.5]   | -15.7 (11.4) | (reference)     |                     |
| Always                                                     | 14  | (5.5)  | -25.1 (-28.7,-10.5) [-48.4,0.5]   | -21.7 (13.4) | -6.0            | (-14.2,2.2)         |
| Stopped                                                    | 12  | (4.7)  | -14.2 (-27.1,-8.3) [-30.2,-1.0]   | -15.9 (10.0) | -0.2            | (-9.0, 8.5)         |
| Started                                                    | 17  | (6.6)  | -17.5 (-31.2,-11.4) [-46.2,-4.6]  | -21.5 (12.9) | -5.8            | (-13.4,1.8)         |
| Sometimes, initially no                                    | 100 | (39.1) | -16.3 (-23.2,-10.0) [-43.4,3.5]   | -16.8 (9.7)  | -1.1            | (-5.6, 3.3)         |
| Sometimes, initially yes                                   | 51  | (19.9) | -17.0 (-24.9,-10.3) [-49.2,11.7]  | -16.8 (11.1) | -1.1            | (-6.3, 4.1)         |
| <b>Keep a food diary</b> (n=269, R2=0.7%)                  |     |        |                                   |              |                 |                     |
| Never                                                      | 242 | (90.0) | -16.8 (-24.7,-10.1) [-49.2,12.5]  | -17.3 (10.7) | (reference)     |                     |
| Stopped                                                    | 15  | (5.6)  | -17.0 (-22.8,-10.3) [-33.1,-0.8]  | -16.1 (10.5) | 1.2             | (-5.6, 8.0)         |
| Started                                                    | 1   | (0.4)  | -14.3 (-14.3,-14.3) [-14.3,-14.3] | -14.3 (.)    | 3.0             | (-22.7,28.7)        |
| Sometimes, initially no                                    | 11  | (4.1)  | -10.0 (-21.8,-3.8) [-34.8,1.7]    | -12.9 (11.4) | 4.5             | (-3.5, 12.4)        |
| <b>Eat breakfast regularly (6-7/week)</b> (n=268, R2=1.4%) |     |        |                                   |              |                 |                     |
| Never                                                      | 34  | (12.7) | -14.7 (-23.2,-9.9) [-38.1,11.7]   | -15.6 (11.2) | (reference)     |                     |
| Always                                                     | 108 | (40.3) | -16.8 (-24.4,-9.1) [-49.2,12.5]   | -16.8 (10.4) | -1.2            | (-6.7, 4.3)         |
| Stopped                                                    | 13  | (4.9)  | -16.6 (-19.4,-9.7) [-42.6,3.5]    | -16.8 (11.8) | -1.2            | (-10.3,7.9)         |
| Started                                                    | 22  | (8.2)  | -20.2 (-26.1,-11.9) [-32.7,-1.4]  | -19.5 (8.8)  | -3.9            | (-11.5,3.7)         |
| Sometimes, initially no                                    | 38  | (14.2) | -17.8 (-24.5,-12.4) [-56.1,6.7]   | -19.6 (12.2) | -4.0            | (-10.6,2.6)         |
| Sometimes, initially yes                                   | 53  | (19.8) | -17.0 (-27.0,-9.5) [-48.4,11.3]   | -18.0 (12.3) | -2.4            | (-8.5, 3.8)         |
| <b>Eat lunch regularly (6-7/week)</b> (n=270, R2=1.2%)     |     |        |                                   |              |                 |                     |
| Never                                                      | 18  | (6.7)  | -14.8 (-24.9,-8.9) [-37.5,2.8]    | -16.6 (10.9) | (reference)     |                     |
| Always                                                     | 146 | (54.1) | -16.8 (-25.5,-10.5) [-56.1,12.5]  | -17.5 (11.0) | -0.9            | (-7.8, 5.9)         |
| Stopped                                                    | 8   | (3.0)  | -15.3 (-25.5,-7.6) [-38.1,-7.2]   | -17.8 (11.4) | -1.1            | (-12.8,10.5)        |
| Started                                                    | 15  | (5.6)  | -18.4 (-24.7,-13.4) [-32.0,-3.6]  | -18.9 (8.7)  | -2.3            | (-11.9,7.3)         |
| Sometimes, initially no                                    | 29  | (10.7) | -13.5 (-21.8,-9.5) [-34.2,6.7]    | -14.3 (10.0) | 2.3             | (-6.0, 10.5)        |
| Sometimes, initially yes                                   | 54  | (20.0) | -17.8 (-24.9,-11.9) [-46.2,11.3]  | -18.6 (12.3) | -2.0            | (-9.5, 5.5)         |

| Factor                                                         | n   | (%)    | Median (IQR) [range]             | Mean (SD)    | Mean Difference   | Simultaneous 95% CI |
|----------------------------------------------------------------|-----|--------|----------------------------------|--------------|-------------------|---------------------|
| <b>Eat dinner regularly (6-7/week) (n=268, R2=1.0%)</b>        |     |        |                                  |              |                   |                     |
| Never                                                          | 5   | (1.9)  | -14.7 (-34.2,-14.2) [-38.1,-8.1] | -21.9 (13.4) | (reference)       |                     |
| Always                                                         | 206 | (76.9) | -16.7 (-24.9,-9.6) [-56.1,12.5]  | -17.4 (11.3) | 4.5 (-7.7, 16.7)  |                     |
| Stopped                                                        | 2   | (0.7)  | -7.4 (-14.1,-0.8) [-14.1,-0.8]   | -7.4 (9.4)   | 14.4 (-8.1, 37.0) |                     |
| Started                                                        | 10  | (3.7)  | -17.0 (-23.6,-10.3) [-32.0,-1.4] | -16.5 (9.6)  | 5.4 (-9.4, 20.1)  |                     |
| Sometimes, initially no                                        | 8   | (3.0)  | -18.3 (-21.3,-14.2) [-30.3,-1.0] | -17.4 (8.5)  | 4.5 (-10.9,19.8)  |                     |
| Sometimes, initially yes                                       | 37  | (13.8) | -16.6 (-23.9,-12.4) [-34.8,3.9]  | -17.6 (10.2) | 4.3 (-8.5, 17.1)  |                     |
| <b>Eat breakfast, lunch, dinner regularly (n=265, R2=1.3%)</b> |     |        |                                  |              |                   |                     |
| Never                                                          | 59  | (22.3) | -14.7 (-23.2,-9.6) [-46.2,11.7]  | -16.1 (10.9) | (reference)       |                     |
| Always                                                         | 71  | (26.8) | -17.1 (-25.3,-8.4) [-49.2,12.5]  | -16.7 (10.6) | -0.6 (-5.6, 4.3)  |                     |
| Stopped                                                        | 14  | (5.3)  | -17.1 (-20.2,-7.2) [-42.6,3.5]   | -16.5 (12.5) | -0.4 (-8.8, 7.9)  |                     |
| Started                                                        | 23  | (8.7)  | -17.0 (-25.5,-11.9) [-32.7,-3.6] | -18.3 (7.9)  | -2.2 (-9.1, 4.7)  |                     |
| Sometimes, initially no                                        | 46  | (17.4) | -21.1 (-23.6,-12.0) [-56.1,6.7]  | -19.4 (10.4) | -3.4 (-8.9, 2.2)  |                     |
| Sometimes, initially yes                                       | 52  | (19.6) | -16.9 (-29.8,-8.4) [-48.4,11.3]  | -18.3 (13.0) | -2.3 (-7.6, 3.1)  |                     |
| <b>Eat when not hungry (n=270, R2=4.0%)</b>                    |     |        |                                  |              |                   |                     |
| Never                                                          | 123 | (45.6) | -16.2 (-26.5,-9.3) [-56.1,12.5]  | -17.4 (12.2) | (reference)       |                     |
| Always                                                         | 19  | (7.0)  | -16.0 (-21.5,-3.2) [-49.2,1.7]   | -14.0 (12.3) | 3.3 (-3.6, 10.2)  |                     |
| Stopped                                                        | 56  | (20.7) | -20.9 (-26.5,-14.5) [-46.2,3.5]  | -20.4 (8.8)  | -3.0 (-7.5, 1.5)  |                     |
| Started                                                        | 2   | (0.7)  | -17.8 (-34.2,-1.4) [-34.2,-1.4]  | -17.8 (23.2) | -0.5 (-20.3,19.4) |                     |
| Sometimes, initially no                                        | 24  | (8.9)  | -13.1 (-18.5,-6.6) [-27.3,3.9]   | -12.5 (7.8)  | 4.8 (-1.4, 11.0)  |                     |
| Sometimes, initially yes                                       | 46  | (17.0) | -15.4 (-23.5,-11.1) [-40.3,2.3]  | -16.8 (9.3)  | 0.6 (-4.2, 5.4)   |                     |
| <b>Eat when feel full (n=270, R2=4.9%)</b>                     |     |        |                                  |              |                   |                     |
| Never                                                          | 157 | (58.1) | -16.9 (-25.5,-10.0) [-56.1,12.5] | -17.4 (11.5) | (reference)       |                     |
| Always                                                         | 9   | (3.3)  | -6.4 (-17.3,-1.2) [-49.2,1.7]    | -13.2 (16.1) | 4.2 (-5.4, 13.7)  |                     |
| Stopped                                                        | 46  | (17.0) | -21.2 (-26.5,-13.5) [-46.2,-3.2] | -20.7 (8.8)  | -3.3 (-7.9, 1.4)  |                     |
| Started                                                        | 4   | (1.5)  | -3.2 (-13.9,-0.5) [-22.8,0.5]    | -7.2 (10.7)  | 10.2 (-3.9, 24.3) |                     |
| Sometimes, initially no                                        | 28  | (10.4) | -12.2 (-17.9,-5.8) [-34.2,3.9]   | -13.0 (10.1) | 4.3 (-1.4, 10.0)  |                     |
| Sometimes, initially yes                                       | 26  | (9.6)  | -16.9 (-23.5,-11.9) [-31.9,2.1]  | -17.7 (8.5)  | -0.3 (-6.2, 5.6)  |                     |
| <b>Eat continuously during the day (n=260, R2=5.1%)</b>        |     |        |                                  |              |                   |                     |
| Never                                                          | 40  | (15.4) | -17.1 (-21.8,-11.0) [-35.0,-4.5] | -17.3 (7.2)  | (reference)       |                     |
| Always                                                         | 67  | (25.8) | -14.9 (-22.7,-6.4) [-31.9,3.9]   | -14.5 (9.5)  | 2.8 (-2.7, 8.3)   |                     |
| Stopped                                                        | 17  | (6.5)  | -18.8 (-26.5,-10.0) [-33.7,2.8]  | -18.3 (10.9) | -1.1 (-9.0, 6.9)  |                     |
| Started                                                        | 12  | (4.6)  | -10.8 (-15.7,-4.0) [-26.5,4.2]   | -10.2 (8.4)  | 7.0 (-2.0, 16.1)  |                     |
| Sometimes, initially no                                        | 52  | (20.0) | -19.1 (-30.4,-8.7) [-56.1,11.7]  | -19.8 (14.7) | -2.5 (-8.3, 3.2)  |                     |
| Sometimes, initially yes                                       | 72  | (27.7) | -18.0 (-25.5,-11.9) [-46.2,12.5] | -18.6 (10.7) | -1.3 (-6.7, 4.1)  |                     |

| Factor                                            | n   | (%)    | Median (IQR) [range]              | Mean (SD)    | Mean Difference   | Simultaneous 95% CI |
|---------------------------------------------------|-----|--------|-----------------------------------|--------------|-------------------|---------------------|
| <b>Binge eating</b><br>(n=258, R2=4.7%)           |     |        |                                   |              |                   |                     |
| Never                                             | 174 | (67.4) | -16.8 (-24.7,-10.5) [-56.1,12.5]  | -17.8 (11.4) | (reference)       |                     |
| Always                                            | 6   | (2.3)  | -6.5 (-14.6,-1.2) [-28.1,-0.6]    | -9.6 (10.4)  | 8.2 (-3.5, 20.0)  |                     |
| Stopped                                           | 42  | (16.3) | -21.6 (-26.5,-14.2) [-46.2,2.3]   | -20.2 (9.8)  | -2.4 (-7.2, 2.5)  |                     |
| Started                                           | 2   | (0.8)  | -9.3 (-17.1,-1.4) [-17.1,-1.4]    | -9.3 (11.1)  | 8.5 (-11.6,28.7)  |                     |
| Sometimes, initially no                           | 18  | (7.0)  | -12.4 (-19.2,-4.9) [-28.6,6.7]    | -11.5 (10.2) | 6.3 (-0.7, 13.3)  |                     |
| Sometimes, initially yes                          | 16  | (6.2)  | -13.4 (-25.3,-10.4) [-33.1,1.7]   | -16.3 (10.3) | 1.6 (-5.9, 9.0)   |                     |
| <b>Binge eating disorder</b><br>(n=257, R2=5.1%)  |     |        |                                   |              |                   |                     |
| Never                                             | 203 | (79.0) | -16.4 (-24.7,-10.0) [-56.1,12.5]  | -17.3 (11.3) | (reference)       |                     |
| Always                                            | 3   | (1.2)  | -1.2 (-14.6,-0.6) [-14.6,-0.6]    | -5.5 (7.9)   | 11.8 (-4.7, 28.4) |                     |
| Stopped                                           | 28  | (10.9) | -22.8 (-29.4,-16.7) [-46.2,-6.8]  | -22.4 (9.1)  | -5.1 (-10.8,0.6)  |                     |
| Started                                           | 1   | (0.4)  | -1.4 (-1.4,-1.4) [-1.4,-1.4]      | -1.4 (.)     | 15.8 (-12.7,44.4) |                     |
| Sometimes, initially no                           | 11  | (4.3)  | -16.2 (-20.1,-4.9) [-33.1,6.7]    | -13.6 (12.4) | 3.7 (-5.1, 12.5)  |                     |
| Sometimes, initially yes                          | 11  | (4.3)  | -10.5 (-24.2,-5.1) [-31.9,1.7]    | -14.3 (10.9) | 3.0 (-5.8, 11.8)  |                     |
| <b>Loss of control eating</b><br>(n=254, R2=5.3%) |     |        |                                   |              |                   |                     |
| Never                                             | 94  | (37.0) | -16.6 (-23.2,-11.1) [-56.1,2.8]   | -18.0 (10.1) | (reference)       |                     |
| Always                                            | 36  | (14.2) | -11.8 (-23.3,-4.7) [-31.9,3.9]    | -13.0 (10.5) | 5.0 (-0.4, 10.5)  |                     |
| Stopped                                           | 21  | (8.3)  | -23.9 (-29.4,-10.0) [-40.6,-4.2]  | -21.6 (11.3) | -3.6 (-10.3,3.1)  |                     |
| Started                                           | 9   | (3.5)  | -16.4 (-18.3,-10.5) [-26.5,-3.2]  | -15.0 (7.8)  | 3.0 (-6.7, 12.7)  |                     |
| Sometimes, initially no                           | 54  | (21.3) | -16.0 (-21.2,-7.0) [-48.4,11.7]   | -15.1 (12.5) | 2.9 (-1.8, 7.6)   |                     |
| Sometimes, initially yes                          | 40  | (15.7) | -20.6 (-25.1,-13.9) [-46.2,12.5]  | -19.7 (10.6) | -1.7 (-7.0, 3.5)  |                     |
| <b>Night eating syndrome</b><br>(n=191, R2=0.9%)  |     |        |                                   |              |                   |                     |
| Never                                             | 140 | (73.3) | -17.0 (-24.8,-10.0) [-46.2,12.5]  | -17.2 (10.7) | (reference)       |                     |
| Always                                            | 2   | (1.0)  | -8.3 (-9.5,-7.0) [-9.5,-7.0]      | -8.3 (1.7)   | 8.9 (-11.2,29.0)  |                     |
| Stopped                                           | 14  | (7.3)  | -17.7 (-22.7,-4.6) [-48.4,3.5]    | -17.4 (14.0) | -0.2 (-8.1, 7.7)  |                     |
| Started                                           | 2   | (1.0)  | -18.7 (-20.3,-17.1) [-20.3,-17.1] | -18.7 (2.2)  | -1.5 (-21.6,18.5) |                     |
| Sometimes, initially no                           | 23  | (12.0) | -20.1 (-25.3,-11.4) [-30.6,3.9]   | -17.6 (9.8)  | -0.4 (-6.8, 5.9)  |                     |
| Sometimes, initially yes                          | 10  | (5.2)  | -15.1 (-21.5,-6.8) [-37.5,6.7]    | -15.1 (12.8) | 2.0 (-7.2, 11.3)  |                     |
| <b>Alcohol use disorder</b><br>(n=273, R2=2.6%)   |     |        |                                   |              |                   |                     |
| Never                                             | 234 | (85.7) | -16.5 (-23.5,-9.6) [-56.1,12.5]   | -16.7 (10.8) | (reference)       |                     |
| Always                                            | 3   | (1.1)  | -20.0 (-21.7,-8.9) [-21.7,-8.9]   | -16.9 (6.9)  | -0.2 (-16.6,16.3) |                     |
| Stopped                                           | 6   | (2.2)  | -22.1 (-30.3,-10.0) [-33.9,0.4]   | -19.7 (13.6) | -2.9 (-14.7,8.8)  |                     |
| Started                                           | 2   | (0.7)  | -16.4 (-21.0,-11.9) [-21.0,-11.9] | -16.4 (6.4)  | 0.3 (-19.8,20.4)  |                     |
| Sometimes, initially no                           | 16  | (5.9)  | -19.8 (-33.7,-12.6) [-48.4,-3.6]  | -23.1 (14.3) | -6.4 (-13.7,0.9)  |                     |
| Sometimes, initially yes                          | 12  | (4.4)  | -24.6 (-28.3,-13.4) [-33.1,-7.4]  | -21.6 (8.7)  | -4.9 (-13.3,3.5)  |                     |

| Factor                                                              | n   | (%)    | Median (IQR) [range]              | Mean (SD)    | Mean Difference | Simultaneous 95% CI |
|---------------------------------------------------------------------|-----|--------|-----------------------------------|--------------|-----------------|---------------------|
| <b>Drink any alcohol</b><br>(n=276, R2=2.8%)                        |     |        |                                   |              |                 |                     |
| Never                                                               | 74  | (26.8) | -15.3 (-21.4,-9.6) [-56.1,6.7]    | -15.4 (10.3) | (reference)     |                     |
| Always                                                              | 141 | (51.1) | -17.0 (-25.5,-9.7) [-49.2,12.5]   | -17.5 (11.0) |                 | -2.1 (-6.1, 2.0)    |
| Stopped                                                             | 5   | (1.8)  | -15.0 (-28.7,-13.7) [-38.1,-3.2]  | -19.7 (13.7) |                 | -4.3 (-17.4,8.7)    |
| Started                                                             | 5   | (1.8)  | -25.6 (-32.9,-24.2) [-48.4,-6.5]  | -27.5 (15.2) |                 | -12.1 (-25.1,0.9)   |
| Sometimes, initially no                                             | 28  | (10.1) | -18.1 (-27.3,-13.1) [-46.2,2.3]   | -19.3 (11.4) |                 | -3.9 (-10.2,2.4)    |
| Sometimes, initially yes                                            | 23  | (8.3)  | -15.6 (-24.9,-11.9) [-40.6,11.3]  | -17.4 (10.8) |                 | -2.0 (-8.7, 4.8)    |
| <b>Drink alcohol regularly (2+/<b>week</b>)</b><br>(n=276, R2=3.7%) |     |        |                                   |              |                 |                     |
| Never                                                               | 226 | (81.9) | -15.9 (-23.1,-9.5) [-56.1,11.7]   | -16.4 (10.9) | (reference)     |                     |
| Always                                                              | 19  | (6.9)  | -22.8 (-30.2,-18.3) [-33.9,-7.4]  | -22.8 (7.7)  |                 | -6.3 (-13.0,0.3)    |
| Stopped                                                             | 4   | (1.4)  | -18.7 (-28.7,-0.8) [-34.2,12.5]   | -14.8 (20.0) |                 | 1.7 (-12.4,15.8)    |
| Started                                                             | 3   | (1.1)  | -23.4 (-25.9,-16.3) [-25.9,-16.3] | -21.8 (5.0)  |                 | -5.4 (-21.7,10.9)   |
| Sometimes, initially no                                             | 22  | (8.0)  | -21.3 (-31.6,-11.1) [-46.2,-3.2]  | -21.3 (12.3) |                 | -4.9 (-11.1,1.4)    |
| Sometimes, initially yes                                            | 2   | (0.7)  | -23.2 (-29.4,-17.0) [-29.4,-17.0] | -23.2 (8.8)  |                 | -6.8 (-26.7,13.1)   |
| <b>Smoker</b><br>(n=283, R2=0.5%)                                   |     |        |                                   |              |                 |                     |
| Never                                                               | 260 | (91.9) | -16.9 (-24.8,-9.7) [-56.1,12.5]   | -17.3 (11.2) | (reference)     |                     |
| Always                                                              | 1   | (0.4)  | -13.7 (-13.7,-13.7) [-13.7,-13.7] | -13.7 (.)    |                 | 3.7 (-24.8,32.1)    |
| Stopped                                                             | 2   | (0.7)  | -18.7 (-18.7,-18.6) [-18.7,-18.6] | -18.7 (0.1)  |                 | -1.4 (-21.5,18.8)   |
| Started                                                             | 8   | (2.8)  | -17.4 (-23.8,-8.0) [-26.5,2.8]    | -15.2 (10.2) |                 | 2.1 (-8.1, 12.2)    |
| Sometimes, initially no                                             | 11  | (3.9)  | -16.4 (-20.3,-13.1) [-32.4,-5.2]  | -17.6 (7.1)  |                 | -0.3 (-9.0, 8.4)    |
| Sometimes, initially yes                                            | 1   | (0.4)  | -6.5 (-6.5,-6.5) [-6.5,-6.5]      | -6.5 (.)     |                 | 10.8 (-17.6,39.2)   |
| <b>Illegal drug use</b><br>(n=266, R2=2.6%)                         |     |        |                                   |              |                 |                     |
| Never                                                               | 252 | (94.7) | -16.5 (-24.1,-9.6) [-56.1,12.5]   | -17.1 (10.9) | (reference)     |                     |
| Always                                                              | 3   | (1.1)  | -16.7 (-28.1,-12.3) [-28.1,-12.3] | -19.1 (8.1)  |                 | -2.0 (-18.6,14.6)   |
| Stopped                                                             | 2   | (0.8)  | -17.5 (-18.1,-16.9) [-18.1,-16.9] | -17.5 (0.8)  |                 | -0.4 (-20.7,19.9)   |
| Started                                                             | 2   | (0.8)  | -31.4 (-48.4,-14.3) [-48.4,-14.3] | -31.4 (24.1) |                 | -14.3 (-34.6,6.0)   |
| Sometimes, initially no                                             | 2   | (0.8)  | -8.4 (-28.5,11.7) [-28.5,11.7]    | -8.4 (28.5)  |                 | 8.7 (-11.6,29.0)    |
| Sometimes, initially yes                                            | 5   | (1.9)  | -25.5 (-27.0,-15.8) [-42.6,-12.5] | -24.7 (11.8) |                 | -7.6 (-20.5,5.3)    |

**eTable 5. The SRMR for each model for the RYGB analysis.**

| <b>Baseline Model</b>          | <b>SRMR</b> | <b>n</b> |
|--------------------------------|-------------|----------|
| Age, BMI, Sex, Diabetes status | 1.2374E-8   | 1513     |

| <b>Obs</b> | <b>label</b>         | <b>n</b> | <b>SRMR</b> |
|------------|----------------------|----------|-------------|
| 1          | Self-weigh weekly    | 1513     | .000005895  |
| 2          | See nutritionist/die | 1513     | .000000927  |
| 3          | See trainer/exercise | 1513     | .000000739  |
| 4          | Keep a food diary    | 1513     | .000001529  |
| 5          | Count fat grams      | 1513     | .000000461  |
| 6          | Decrease fat intake  | 1513     | .000005538  |
| 7          | Reduce number of cal | 1513     | .000000549  |
| 8          | Use a very low calor | 1513     | .000000410  |
| 9          | Cut out between-meal | 1513     | .000000780  |
| 10         | Eat fewer high carbo | 1513     | .000000602  |
| 11         | Eat special low calo | 1513     | .000006283  |
| 12         | Eat or drink meal re | 1513     | .000000930  |
| 13         | Increase fruits and  | 1513     | .000000343  |
| 14         | Cut out sugar-sweete | 1513     | .000001289  |
| 15         | Eat breakfast regula | 1513     | .000000395  |
| 16         | Eat breakfast, lunch | 1513     | .000000273  |
| 17         | Eat when feel full,  | 1513     | .000000624  |
| 18         | Eat when not hungry, | 1513     | .000000266  |
| 19         | Eat continuously dur | 1513     | .000001332  |
| 20         | Binge eating disorde | 1513     | .000002168  |
| 21         | Loss of control eati | 1513     | .000001553  |
| 22         | Night eating syndrom | 1513     | .000000949  |
| 23         | Evening hyperphagia  | 1513     | .000000092  |
| 24         | Night eating         | 1513     | .000000094  |
| 25         | Alcohol use disorder | 1513     | .000000295  |
| 26         | Smoker               | 1513     | .000008223  |
| 27         | Illegal drug use     | 1513     | .000000730  |

**eTable 6. The SRMR for each model for the LAGB analysis.**

| <b>Baseline Model</b>          | <b>SRMR</b> | <b>n</b> |
|--------------------------------|-------------|----------|
| Age, BMI, Sex, Diabetes status | 0           | 509      |

| <b>Obs</b> | <b>label</b>         | <b>n</b> | <b>SRMR</b> |
|------------|----------------------|----------|-------------|
| 1          | Self-weigh weekly    | 509      | .000014898  |
| 2          | See nutritionist/die | 509      | .000000746  |
| 3          | See trainer/exercise | 509      | .000001344  |
| 4          | Keep a food diary    | 509      | .000021280  |
| 5          | Count fat grams      | 509      | .000001542  |
| 6          | Decrease fat intake  | 509      | .000000957  |
| 7          | Reduce number of cal | 509      | .000008371  |
| 8          | Use a very low calor | 509      | .000001771  |
| 9          | Cut out between-meal | 509      | .000006075  |
| 10         | Eat fewer high carbo | 509      | .000007847  |
| 11         | Eat special low calo | 509      | .000000979  |
| 12         | Eat or drink meal re | 509      | .000001589  |
| 13         | Increase fruits and  | 509      | .000007444  |
| 14         | Cut out sugar-sweete | 509      | .000003179  |
| 15         | Eat breakfast regula | 509      | .000011986  |
| 16         | Eat breakfast, lunch | 509      | .000012189  |
| 17         | Eat when feel full,  | 509      | .000002299  |
| 18         | Eat when not hungry, | 509      | .000006960  |
| 19         | Eat continuously dur | 509      | .000010163  |
| 20         | Binge eating disorde | 509      | .000005275  |
| 21         | Loss of control eati | 509      | .000012423  |
| 22         | Night eating syndrom | 509      | .000005568  |
| 23         | Evening hyperphagia  | 509      | .000000316  |
| 24         | Night eating         | 509      | .000001573  |
| 25         | Alcohol use disorder | 509      | .000002585  |
| 26         | Smoker               | 509      | .000028494  |
| 27         | Illegal drug use     | 509      | .000000975  |



**eTable 7. Fit Summary Example: Self-weigh Week Model LAGB.**

| Fit Summary                                                                                  |                                   |                     |            |
|----------------------------------------------------------------------------------------------|-----------------------------------|---------------------|------------|
| Modeling Info                                                                                | Number of Complete Observations   | 270                 |            |
|                                                                                              | Number of Incomplete Observations | 239                 |            |
|                                                                                              | Number of Variables               | 9                   |            |
|                                                                                              | Number of Moments                 | 45                  |            |
|                                                                                              | Number of Parameters              | 45                  |            |
|                                                                                              | Number of Active Constraints      | 0                   |            |
|                                                                                              | Saturated Model Estimation        | FIML                |            |
|                                                                                              | Saturated Model Function Value    | 27.8684             |            |
|                                                                                              | Saturated Model -2 Log-Likelihood | 14185.0403          |            |
|                                                                                              | Baseline Model Estimation         | Converged           |            |
|                                                                                              | Baseline Model Function Value     | 29.0034             |            |
|                                                                                              | Baseline Model -2 Log-Likelihood  | 14762.7433          |            |
|                                                                                              | Baseline Model Chi-Square         | 577.7031            |            |
|                                                                                              | Baseline Model Chi-Square DF      | 36                  |            |
|                                                                                              | Pr > Baseline Model Chi-Square    | <.0001              |            |
|                                                                                              | Absolute Index                    | Fit Function        | 27.8684    |
|                                                                                              |                                   | -2 Log-Likelihood   | 14185.0403 |
| Chi-Square                                                                                   |                                   | .                   |            |
| Chi-Square DF                                                                                |                                   | 0                   |            |
| Pr > Chi-Square                                                                              |                                   | .                   |            |
| Z-Test of Wilson & Hilferty                                                                  |                                   | .                   |            |
| Hoelter Critical N                                                                           |                                   | .                   |            |
| Root Mean Square Residual (RMR)                                                              |                                   | 0.0001              |            |
| Standardized RMR (SRMR)                                                                      |                                   | 0.0000              |            |
| Goodness of Fit Index (GFI)                                                                  |                                   | 1.0000              |            |
| Parsimony Index                                                                              |                                   | Adjusted GFI (AGFI) | .          |
|                                                                                              | Parsimonious GFI                  | 0.0000              |            |
|                                                                                              | RMSEA Estimate                    | .                   |            |
|                                                                                              | Probability of Close Fit          | .                   |            |
|                                                                                              | Akaike Information Criterion      | 14275.0403          |            |
|                                                                                              | Bozdogan CAIC                     | 14510.5004          |            |
|                                                                                              | Schwarz Bayesian Criterion        | 14465.5004          |            |
|                                                                                              | McDonald Centrality               | .                   |            |
| Incremental Index                                                                            | Bentler Comparative Fit Index     | .                   |            |
|                                                                                              | Bentler-Bonett NFI                | 0.0391              |            |
|                                                                                              | Bentler-Bonett Non-normed Index   | .                   |            |
|                                                                                              | Bollen Normed Index Rho1          | .                   |            |
|                                                                                              | Bollen Non-normed Index Delta2    | .                   |            |
|                                                                                              | James et al. Parsimonious NFI     | .                   |            |
| NOTE: Saturated mean structure parameters are excluded from the computations of fit indices. |                                   |                     |            |

**eTable 8. Fit Summary Example: Self-weight Week Model RYGB.**

| Fit Summary                                                                                  |                                          |            |
|----------------------------------------------------------------------------------------------|------------------------------------------|------------|
| <b>Modeling Info</b>                                                                         | <b>Number of Complete Observations</b>   | 777        |
|                                                                                              | <b>Number of Incomplete Observations</b> | 736        |
|                                                                                              | <b>Number of Variables</b>               | 9          |
|                                                                                              | <b>Number of Moments</b>                 | 45         |
|                                                                                              | <b>Number of Parameters</b>              | 45         |
|                                                                                              | <b>Number of Active Constraints</b>      | 0          |
|                                                                                              | <b>Saturated Model Estimation</b>        | FIML       |
|                                                                                              | <b>Saturated Model Function Value</b>    | 27.6899    |
|                                                                                              | <b>Saturated Model -2 Log-Likelihood</b> | 41894.7835 |
|                                                                                              | <b>Baseline Model Estimation</b>         | Converged  |
|                                                                                              | <b>Baseline Model Function Value</b>     | 28.5022    |
|                                                                                              | <b>Baseline Model -2 Log-Likelihood</b>  | 43123.7951 |
|                                                                                              | <b>Baseline Model Chi-Square</b>         | 1229.0115  |
|                                                                                              | <b>Baseline Model Chi-Square DF</b>      | 36         |
|                                                                                              | <b>Pr &gt; Baseline Model Chi-Square</b> | <.0001     |
| <b>Absolute Index</b>                                                                        | <b>Fit Function</b>                      | 27.6899    |
|                                                                                              | <b>-2 Log-Likelihood</b>                 | 41894.7835 |
|                                                                                              | <b>Chi-Square</b>                        | 0.0000     |
|                                                                                              | <b>Chi-Square DF</b>                     | 0          |
|                                                                                              | <b>Pr &gt; Chi-Square</b>                | .          |
|                                                                                              | <b>Z-Test of Wilson &amp; Hilferty</b>   | .          |
|                                                                                              | <b>Hoelter Critical N</b>                | .          |
|                                                                                              | <b>Root Mean Square Residual (RMR)</b>   | 0.0000     |
|                                                                                              | <b>Standardized RMR (SRMR)</b>           | 0.0000     |
|                                                                                              | <b>Goodness of Fit Index (GFI)</b>       | 1.0000     |
| <b>Parsimony Index</b>                                                                       | <b>Adjusted GFI (AGFI)</b>               | .          |
|                                                                                              | <b>Parsimonious GFI</b>                  | 0.0000     |
|                                                                                              | <b>RMSEA Estimate</b>                    | .          |
|                                                                                              | <b>Probability of Close Fit</b>          | .          |
|                                                                                              | <b>Akaike Information Criterion</b>      | 41984.7835 |
|                                                                                              | <b>Bozdogan CAIC</b>                     | 42269.2668 |
|                                                                                              | <b>Schwarz Bayesian Criterion</b>        | 42224.2668 |
|                                                                                              | <b>McDonald Centrality</b>               | 1.0000     |
| <b>Incremental Index</b>                                                                     | <b>Bentler Comparative Fit Index</b>     | 1.0000     |
|                                                                                              | <b>Bentler-Bonett NFI</b>                | 0.0285     |
|                                                                                              | <b>Bentler-Bonett Non-normed Index</b>   | .          |
|                                                                                              | <b>Bollen Normed Index Rho1</b>          | .          |
|                                                                                              | <b>Bollen Non-normed Index Delta2</b>    | 1.0000     |
|                                                                                              | <b>James et al. Parsimonious NFI</b>     | 0.0000     |
| NOTE: Saturated mean structure parameters are excluded from the computations of fit indices. |                                          |            |

**eTable 9. Number of participants represented on each variable in eTables 1 and 2.**

| <b>RYGB</b>                            | <b>Cumulative Frequency</b> | <b>LAGB</b>                            | <b>Cumulative Frequency</b> |
|----------------------------------------|-----------------------------|----------------------------------------|-----------------------------|
| <b>Item</b>                            |                             | <b>Item</b>                            |                             |
| Self-weigh                             | 778                         | Self-weigh                             | 270                         |
| Nutritionist/dietitian                 | 769                         | Nutritionist/dietitian                 | 267                         |
| Trainer/exercise specialist            | 768                         | Trainer/exercise specialist            | 265                         |
| Keep a food diary                      | 750                         | Keep a food diary                      | 269                         |
| Count fat grams                        | 744                         | Count fat grams                        | 261                         |
| Decrease fat intake                    | 747                         | Decrease fat intake                    | 261                         |
| Reduce calories eaten                  | 730                         | Reduce calories eaten                  | 254                         |
| Use very low calorie diet              | 720                         | Use very low calorie diet              | 252                         |
| No between-meal-snacking               | 709                         | No between-meal-snacking               | 245                         |
| Eat fewer high carb foods              | 752                         | Eat fewer high carb foods              | 257                         |
| Eat special low calorie diet foods     | 737                         | Eat special low calorie diet foods     | 253                         |
| Eat/drink meal replacements            | 737                         | Eat/drink meal replacements            | 261                         |
| Increase fruit/vegetables              | 728                         | Increase fruit/vegetables              | 257                         |
| No sugar-sweetened beverages           | 731                         | No sugar-sweetened beverages           | 256                         |
| Eat breakfast regularly                | 781                         | Eat breakfast regularly                | 268                         |
| Eat breakfast, lunch, dinner regularly | 774                         | Eat breakfast, lunch, dinner regularly | 265                         |
| Eat when full more than once a wk      | 796                         | Eat when full more than once a wk      | 270                         |
| Eat when not hungry, >1/wk             | 788                         | Eat when not hungry, >1/wk             | 270                         |
| Eat continuously during day            | 756                         | Eat continuously during day            | 260                         |
| Binge Eating Disorder                  | 765                         | Binge Eating Disorder                  | 257                         |
| Loss of control eating                 | 744                         | Loss of control eating                 | 254                         |
| Night eating syndrome                  | 515                         | Night eating syndrome                  | 191                         |
| Evening hyperphagia                    | 908                         | Evening hyperphagia                    | 321                         |
| Night eating                           | 915                         | Night eating                           | 322                         |
| Alcohol use disorder                   | 785                         | Alcohol use disorder                   | 273                         |
| Smoker                                 | 832                         | Smoker                                 | 283                         |
| Illegal drug use                       | 786                         | Illegal drug use                       | 266                         |
